# Supplementary material
Source: PubMed Central journal article supplement (PMC6053282)
Supplement: NIHMS970989-supplement-Online_Supplemet.pdf [file NIHMS970989-supplement-Online_Supplemet.pdf]

**ONLINE SUPPLEMENT**

**Adenosine Receptors Influence Hypertension in Dahl Salt-Sensitive Rats:  
Dependence on Receptor Subtype, Salt Diet, and Sex**

**Edwin K. Jackson, Delbert G. Gillespie, Zaichuan Mi, and Dongmei Cheng**

Departments of Pharmacology and Chemical Biology  
University of Pittsburgh School of Medicine, Pittsburgh, Pennsylvania 15219

Running title: *Adenosine Receptors in Dahl SS Rats*

**Address for Correspondence:**

Dr. Edwin K. Jackson  
Department of Pharmacology and Chemical Biology  
100 Technology Drive, Room 514  
University of Pittsburgh School of Medicine  
Pittsburgh, PA 15219  
Tel: 412-648-1505  
Fax: 412-624-7050  
E-mail: edj@pitt.edu

**Western Blotting for Adenosine Receptors.** Kidneys were obtained from wildtype, A<sub>1</sub>KO, A<sub>2A</sub>KO, and A<sub>2B</sub>KO Dahl SS rats and were used to obtain tissue from the cortex, medulla, and junction between the two. Proteins were extracted using Tissue Protein Extraction Reagent (Pierce Biotechnology Inc; Rockford, IL). Total protein was measured (Pierce BCA Protein Assay Kit), and protein extracts were boiled for 5 minutes in Laemmli buffer. SDS-polyacrylamide-gel electrophoresis was performed on polyacrylamide gels (8-16%) with 30 µg of protein per lane. Proteins were transferred to PDVF membranes. Membranes were blocked in tris-buffered saline tween-20 containing 5% milk and probed with anti-A<sub>1</sub> receptor (rabbit polyclonal; 1:500; Sigma-Aldrich; St. Louis, MO; catalogue number A-268), anti-A<sub>2A</sub> receptor (rabbit monoclonal; 1:1000; Abcam; Cambridge, MA; catalogue number ab169756), or anti-A<sub>2B</sub> receptor (rabbit polyclonal; 1:1000; Origene; Rockville, MD; catalogue number TA349146) primary antibodies. Membranes were exposed to horseradish-peroxidase-conjugated-goat anti-rabbit antibody (1:2500; Pierce) and visualized with a Konica Minolta Medical Film Processor (Wayne, NJ) using luminal-based enhanced chemiluminescence substrate (Supersignal West Dura Extended Duration Substrate; Pierce).

**Reverse Transcription Quantitative Polymerase Chain Reaction (RT-qPCR) for Assessment of Adenosine Receptor RNA Expression.** Total RNA was isolated from brains and kidneys of male and female wildtype, A<sub>1</sub>KO, A<sub>2A</sub>KO, and A<sub>2B</sub>KO Dahl SS rats (n=3 for each of the 8 sex/genotype combinations, total of 24 rats) using TRIZOL Reagent (Thermo Fisher Scientific; Waltham, MA) according to the manufacturer's instructions. The cDNA was synthesized using iScript™ cDNA synthesis kit (Bio-Rad). qPCR analysis was performed using Power SYBR Green PCR Master Mix (Thermo Fisher Scientific) in the Applied Biosystems QuantStudio 3 Real-Time PCR System (Thermo Fisher Scientific). Primers were: for *Adora1* 5'-tgctgtggatcgatacctcc-3' (forward) and 5'-tcttgctctaccacactcagg-3' (reverse); for *Adora2a* 5'-tgtacatcacggtggagctg-3' (forward) and 5'-gatggtgatagcgaagggga-3' (reverse); for *Adora2b* 5'-tactttctggtgtccctggc-3' (forward) and 5'-cttgctcgtgtccagtgc-3' (reverse); for β-actin 5'-actctccagccttcttc-3' (forward) and 5'-atctccttctgcatcctgtc-3' (reverse). Threshold cycle (Ct) for β-actin was subtracted from Ct for target to calculate 2<sup>ΔCt</sup>, and results were expressed as % of control with control being the 2<sup>ΔCt</sup> for an arbitrarily chosen wildtype rat.

**Acute Hemodynamic Effects of Intravenous Administration of Adenosine Receptor Agonists.** Wildtype, A<sub>1</sub>KO, A<sub>2A</sub>KO, and A<sub>2B</sub>KO Dahl SS rats (approximately 12 weeks of age) were anesthetized with Inactin (90 mg/kg. i.p.), and body temperature was monitored with a rectal temperature probe and maintained at 37°C with a temperature-controlled and heated surgical table and heat lamp. A polyethylene (PE)-240 cannula was placed in the trachea to facilitate respiration, and a PE-50 cannula was placed in the jugular vein for administration of adenosine receptor agonists and for an infusion of 0.9% saline (50 µl/min) to maintain hemodynamic stability. Next, a PE-50 cannula was inserted into the carotid artery for measurement of arterial blood pressure and heart rate using a pressure transducer (Micro-Med, Inc.; Louisville, KY). Also, a 1 mm or 1.5 mm transit-time flow probe was placed on the left renal artery or mesenteric artery, respectively, for measurement of renal (RBF) or mesenteric (MBF) blood flow

using a Transonic T402 transit-time flowmeter (Transonic Systems Inc; Ithaca, NY). Hemodynamic variables were recorded using the PowerLab data acquisition system and LabChart software (ADInstruments, Colorado Springs, CO).

**Effects of Selective A<sub>2B</sub> Receptor Agonist on Proliferation of Cardiac Fibroblasts from Wildtype, A<sub>1</sub>KO, A<sub>2A</sub>KO, and A<sub>2B</sub>KO Rats.** Cardiac fibroblasts (CFs) were isolated from hearts and cultured as previously described<sup>1</sup>. CFs from wildtype, A<sub>1</sub>KO, A<sub>2A</sub>KO, and A<sub>2B</sub>KO rats were growth arrested for 48 hours in 0.25% fetal bovine serum, and then stimulated with 2.5% fetal bovine serum containing various concentrations of the selective A<sub>2B</sub> receptor agonist Bay60-6583<sup>2</sup>. The medium was changed daily, and cells were counted after 4 days as previously described<sup>3</sup>.

1. Dubey RK, Gillespie DG, Mi Z, Jackson EK. Exogenous and endogenous adenosine inhibits fetal calf serum-induced growth of rat cardiac fibroblasts: role of A<sub>2B</sub> receptors. *Circulation*. 1997;96:2656-2666.
2. Schiedel AC, Lacher SK, Linnemann C, Knolle PA, Muller CE. Antiproliferative effects of selective adenosine receptor agonists and antagonists on human lymphocytes: evidence for receptor-independent mechanisms. *Purinergic Signal*. 2013;9:351-365.
3. Zhu X, Gillespie DG, Jackson EK. NPY<sub>1-36</sub> and PYY<sub>1-36</sub> activate cardiac fibroblasts: an effect enhanced by genetic hypertension and inhibition of dipeptidyl peptidase 4. *Am J Physiol Heart Circ Physiol*. 2015;309:H1528-1542.

**A****Wildtype Genotyping Primers: Amplicon = 176 bp**

Forward Primer: **TCGTGTCACTGGCGGTAGCT**

Reverse Primer: **GTATCGATCCACAGCAATGG**

Wildtype sequence in Exon 1: 1406 **ccattgctgtgg**

1201 tgggctgtga aggtgaacca ggcacttcgc gatgccacct tctgcttca**T CGTGTCACTG**

1261 **GCGGTAGCT**g atgtggccgt tggcgccctg gtcatccac tggccatcct tatcaacatt

1321 gggccacaga cctacttcca cacctgcctc atggtggcct gcctgtcct catcctcacc

1381 cagagctcca ttctggctct gctcg**CCATT GCTGTGGATC GATAC**ctccg agtcaagatc

1441 cctctccggt gactgcacag cagcccaagg tactctgtga aaccgatgt tgggtggctt

1501 ggggatgag ctagagaaga cagaagtgc taagccccca agtcagtcag gtattctctg

1561 gccatttga tccagccca catctcctc ctgggctctg tgtgggatg ctacagcagag

1621 ctgaggctgg agaagcagga gggggctggg tgtccagaga attacatcc cgacagtgcc

1681 catgacctca gtgctgaagc ctctgcaacc agagggtctt ggggagcagg tgaagtaggg

**B****A<sub>1</sub> Receptor Knockout Genotyping Primers: Amplicon = 286 bp**

Forward Primer: **GCTCGATCCAATCGATACC**

Reverse Primer: **CACTGAGGTCATGGGCACTG**

Deletion/Insertion in Exon 1: 1406 **atccaxxxxxxx**

1201 tgggctgtga aggtgaacca ggcacttcgc gatgccacct tctgcttcat cgtgtcactg

1261 gcggtagctg atgtggccgt tggcgccctg gtcatccac tggccatcct tatcaacatt

1321 gggccacaga cctacttcca cacctgcctc atggtggcct gcctgtcct catcctcacc

1381 cagagctcca ttctggctct **GCTCGATCCA xxxxxxATC GATACC**ctccg agtcaagatc

1441 cctctccggt gactgcacag cagcccaagg tactctgtga aaccgatgt tgggtggctt

1501 ggggatgag ctagagaaga cagaagtgc taagccccca agtcagtcag gtattctctg

1561 gccatttga tccagccca catctcctc ctgggctctg tgtgggatg ctacagcagag

1621 ctgaggctgg agaagcagga gggggctggg tgtccagaga attacatcc cga**CAGTGCC**

1681 **CATGACCTCA GTG**ctgaagc ctctgcaacc agagggtctt ggggagcagg tgaagtaggg

**Figure S1.** Denoted in blue letters are the wildtype sequence (A) and corresponding mutated sequence (B) in exon 1 in the A<sub>1</sub> receptor gene. CRIPSR targeting resulted in a 12 bp deletion and 5 bp insertion for a net 7-bp deletion in exon 1. Also shown are the forward and reverse PCR primers for genotyping, the sites in exon 1 targeted by the PCR primers (shown in bold upper case), and the amplicon size.



**Figure S2.** Denoted in blue letters are the wildtype sequence (A) and corresponding mutated sequence (B) in exon 2 in the  $A_{2A}$  receptor gene. CRIPSR targeting resulted in a 98-bp deletion in exon 2. Also shown are the forward and reverse PCR primers for genotyping, the sites in exon 2 targeted by the PCR primers (shown in bold upper case), and the amplicon size. Note: Exon 1 and part of exon 2 are in the UTR region of the  $A_{2A}$  gene and the 98-bp deletion spans the junction between the UTR and the initial part of the protein coding region.

# A

## Wildtype Genotyping Primers: Amplicon = 323 bp

Forward Primer: **ACACAACCCCGGTAGAGGA**

Reverse Primer: **GATGGAGCTCTGTGTGAGCA**

Wildtype sequence in Exon 1: 96 **gctggcccggccatgcagctagagacgcaggacgcgctgta  
cgtggcgctggagctggtatcgccgcgctggcagtgccgggcaactgctggtgtgcgctgcggtgggagcct  
cgagtctttacagacccccaccaactacttttctggtgtccctggcg**

1 gggacgcgcg gtctcggcgc tgtggccatg cctggcggca ccttagcggc tgcctgagc  
61 ccg**ACACAAC CCCGGTAGAG GA**ctccccgg gcccg**gctgg cccggccatg cagctagaga**  
**121 cgcaggacgc gctgtacgtg gcgctggagc tggttatcgc cgcgctggca gtggcgggca**  
**181 acgtgctggt gtgcgctgcg gtgggagcct cgagtgcttt acagaccccc accaactact**  
**241 ttctggtgtc cctggcg**acg gcggacgtgg ctgtgggact cctcgccatc ccctttgcca  
301 tcaccatcag cctgggcttc tgcacggact ttacagctg cctcttctc gcctgcttcg  
361 tgctgg**TGCT CACACAGAGC TCCATC**tta gcctcttggc ggtggctgtc gaccggtatc  
421 tggccattcg cgtcccgctc aggtgagact aatctttctt gccttggcca ggttaaagtt

# B

## A<sub>2B</sub> Knockout Genotyping Primers: Amplicon = 161 bp

Forward Primer: **ACACAACCCCGGTAGAGGA**

Reverse Primer: **GATGGAGCTCTGTGTGAGCA**

Deletion in Exon 1: 96 **XXXXXXXXXXXXXXXXXXXXXXXXXXXXXXXXXXXXXXXXXXXXXXXXXXXXX  
XXXXXXXXXXXXXXXXXXXXXXXXXXXXXXXXXXXXXXXXXXXXXXXXXXXXXXXXXXXXXXXXXXXXX  
XXXXXXXXXXXXXXXXXXXXXXXXXXXXXXXXXXXXXXXXXXXXXXXXXXXXXXXXXXXXXXXXXXXXX**

1 gggacgcgcg gtctcggcgc tgtggccatg cctggcggca ccttagcggc tgcctgagc  
61 ccg**ACACAAC CCCGGTAGAG GA**ctccccgg gcccg**XXXXX XXXXXXXXXXX XXXXXXXXXXX**  
**121 XXXXXXXXXXX XXXXXXXXXXX XXXXXXXXXXX XXXXXXXXXXX XXXXXXXXXXX XXXXXXXXXXX**  
**181 XXXXXXXXXXX XXXXXXXXXXX XXXXXXXXXXX XXXXXXXXXXX XXXXXXXXXXX XXXXXXXXXXX**  
**241 XXXXXXXXXXX XXXXXXX**acg gcggacgtgg ctgtgggact cctcgccatc ccctttgcca  
301 tcaccatcag cctgggcttc tgcacggact ttacagctg cctcttctc gcctgcttcg  
361 tgctgg**TGCT CACACAGAGC TCCATC**tta gcctcttggc ggtggctgtc gaccggtatc  
421 tggccattcg cgtcccgctc aggtgagact aatctttctt gccttggcca ggttaaagtt



**Figure S3.** Denoted in blue letters are the wildtype sequence (A) and corresponding mutated sequence (B) in exon 1 in the  $A_{2B}$  receptor gene. ZFNs targeting resulted in a 162-bp deletion in exon 1. Also shown are the forward and reverse PCR primers for genotyping, the sites in exon 1 targeted by the PCR primers (shown in bold upper case), and the amplicon size.

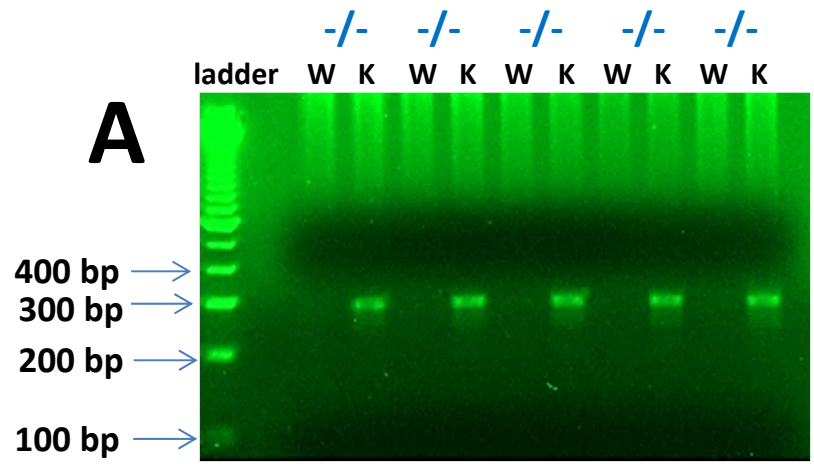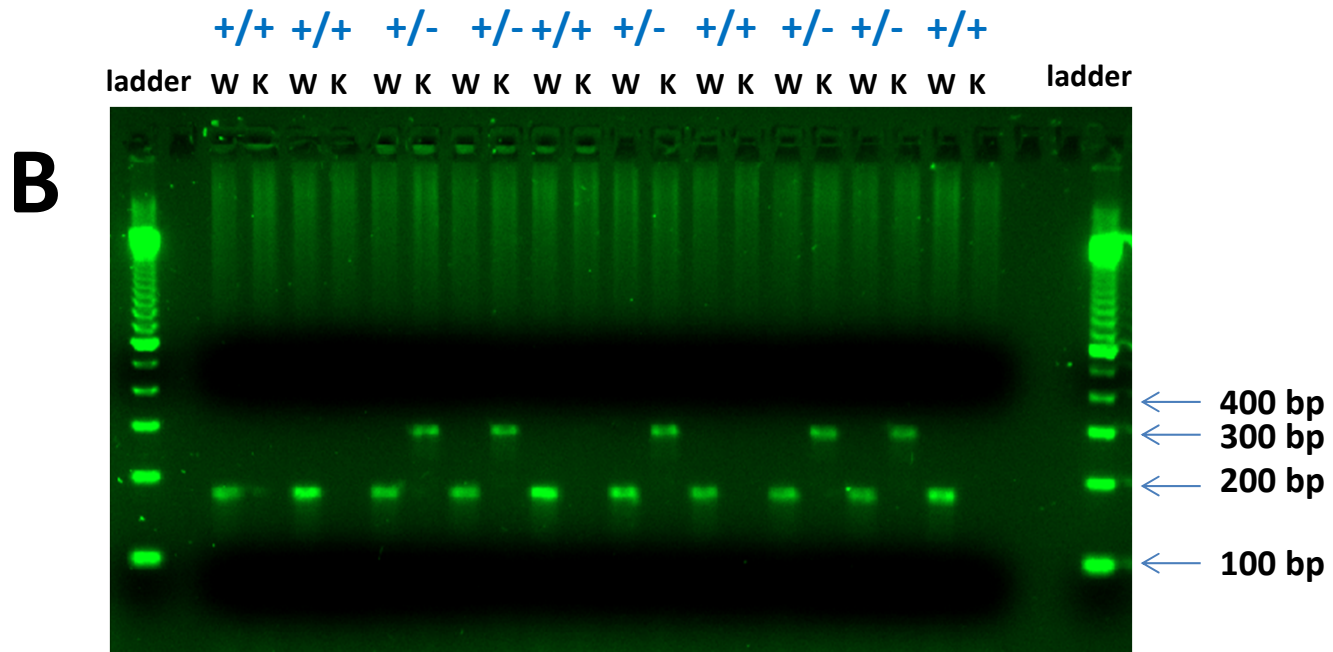

**Figure S4.** Figure displays typical genotyping results for wildtype and A<sub>1</sub>KO Dahl SS rats using agarose gel electrophoresis of PCR amplicons stained with ethidium bromide and imaged using a Bio-Rad Gel Doc XR+ System. (A) Knockout rats (-/-) yielded a 286-bp band only. (B) Wildtype rats (+/+) yielded a 176-bp band only, and heterozygous rats (+/-) produced both the 176 and 286 bands.

## Genotyping of A<sub>2A</sub> Colony

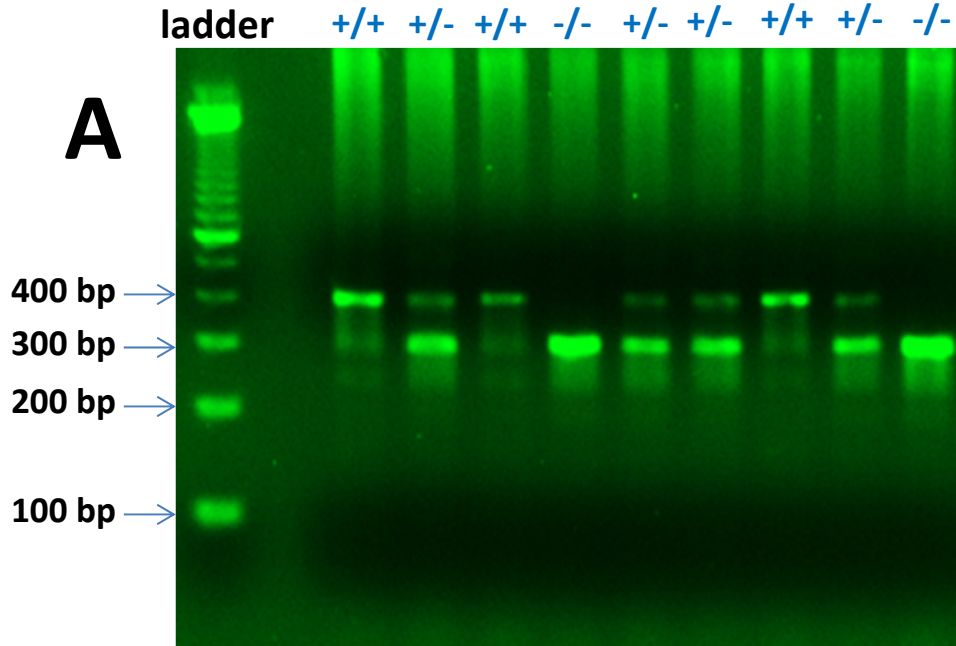

## Genotyping of A<sub>2B</sub> Colony

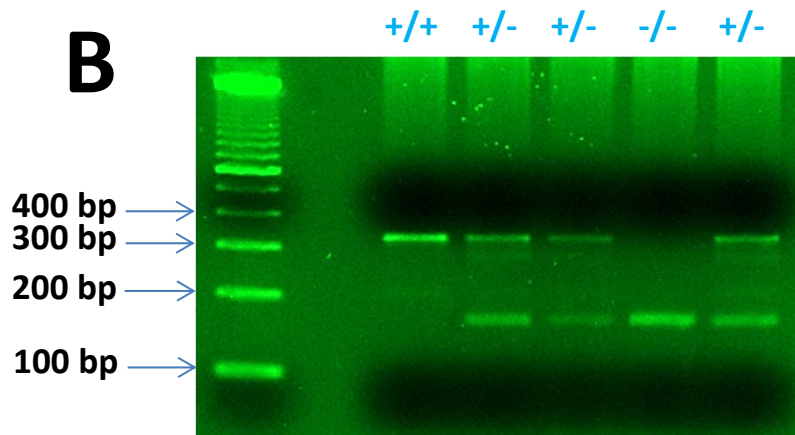

**Figure S5.** Panel A displays typical genotyping results for wildtype and A<sub>2A</sub>KO Dahl SS rats using agarose gel electrophoresis of PCR amplicons stained with ethidium bromide and imaged using a Bio-Rad Gel Doc XR+ System. Knockout rats (-/-) yielded a 296-bp band only, wildtype rats (+/+) yielded a 394-bp band only, and heterozygous rats (+/-) produced both the 176-bp and 286-bp bands. Panel B displays typical genotyping results for wildtype and A<sub>2B</sub>KO Dahl SS rats using the same method. Knockout rats (-/-) yielded a 161-bp band only, wildtype rats (+/+) yielded a 323-bp band only, and heterozygous rats (+/-) produced both the 161-bp and 323-bp bands.

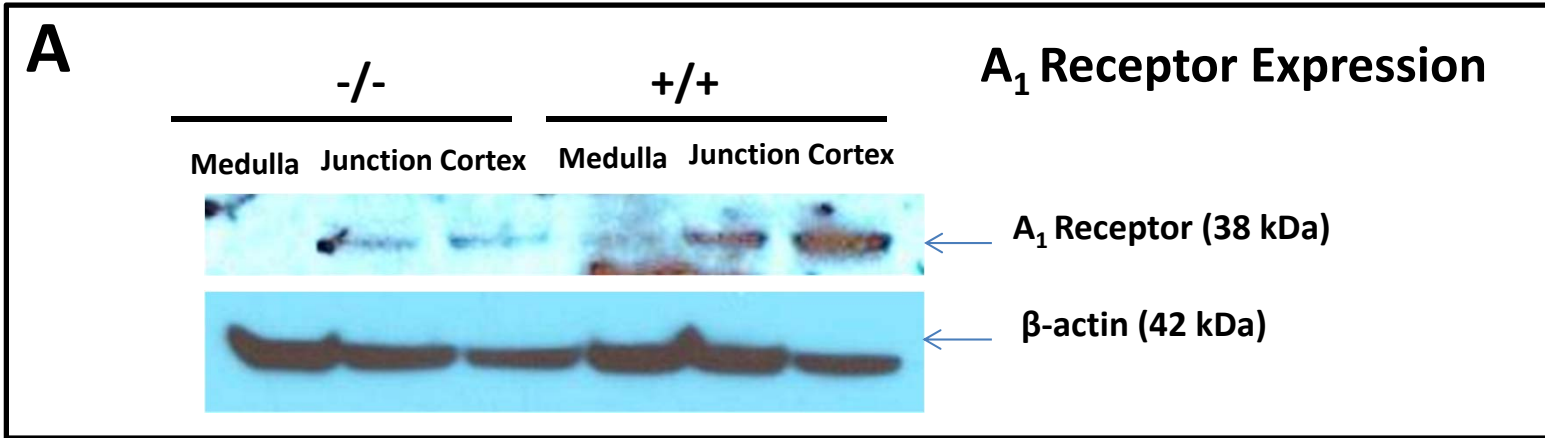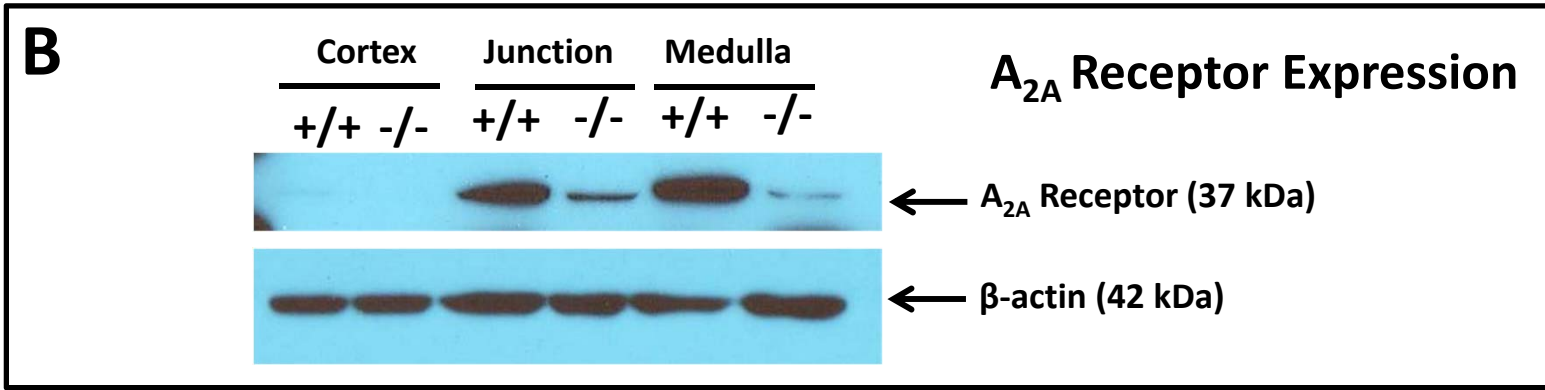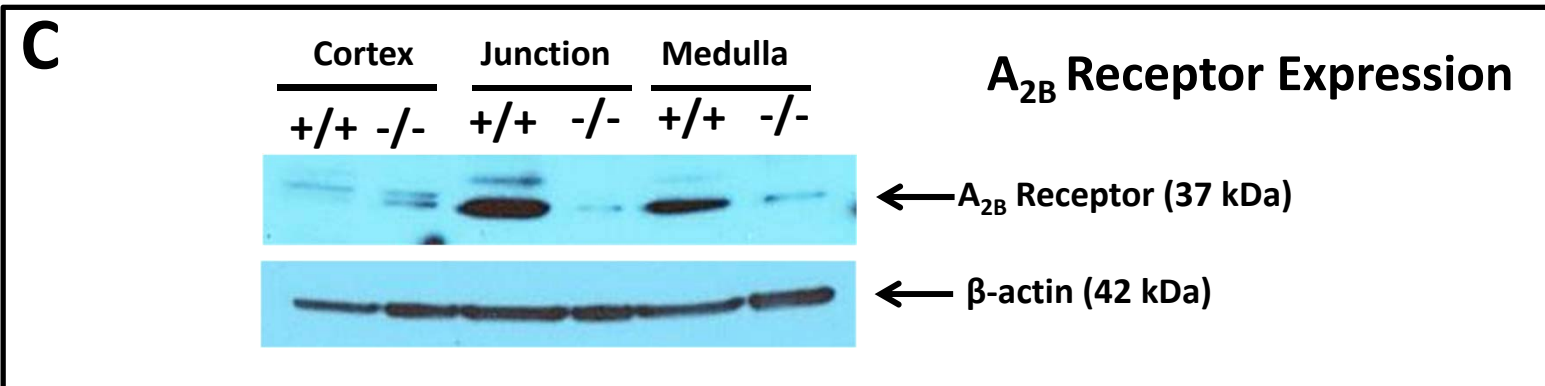

**Figure S6.** Figure demonstrates reduced expression (compared to wildtype (+/+) Dahl SS rats) of  $A_1$ ,  $A_{2A}$ , and  $A_{2B}$  receptors in  $A_1$ ,  $A_{2A}$ , and  $A_{2B}$  knockout (-/-) Dahl SS rats (panels A, B, and C, respectively). Western blots were performed on kidney tissue obtained from the cortex, juxtamedullary region, and medulla.

### A $A_1$ Receptor RNA Expression in Kidney

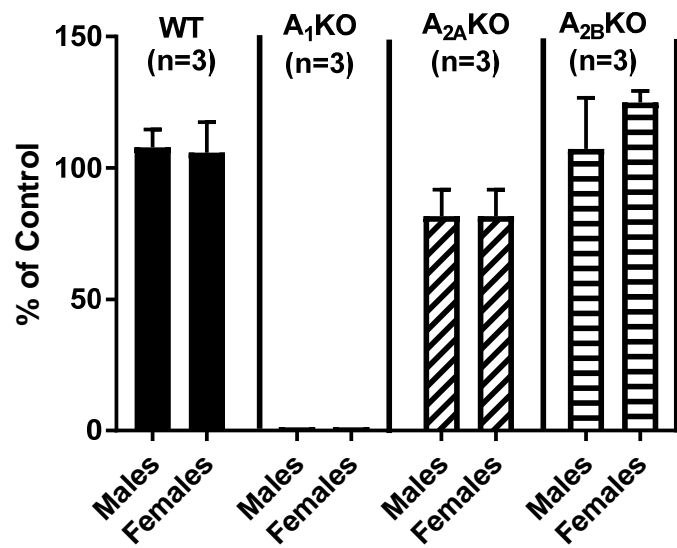

### B $A_{2A}$ Receptor RNA Expression in Kidney

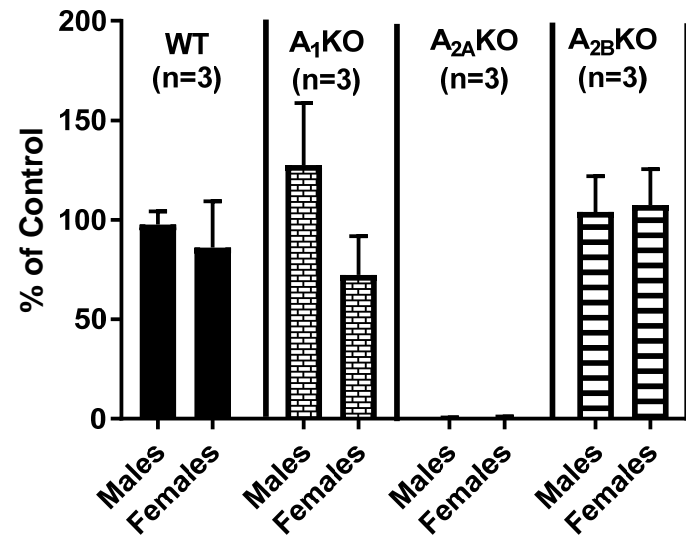

### C $A_{2B}$ Receptor RNA Expression in Kidney

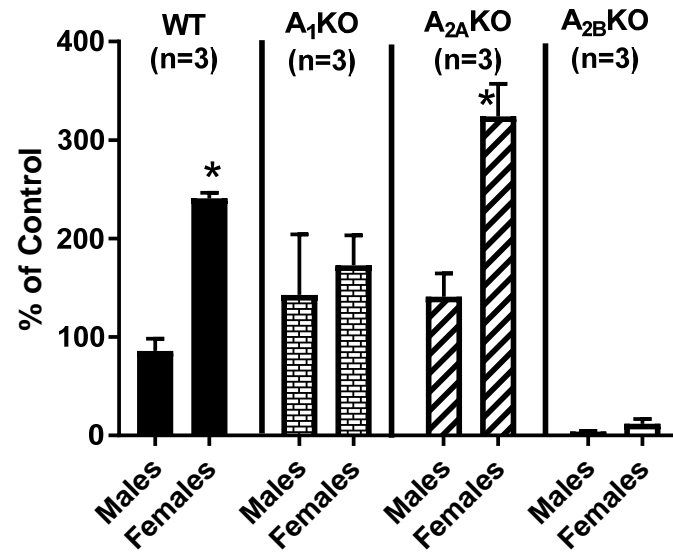



**Figure S7.** Figure summaries A<sub>1</sub> (A), A<sub>2A</sub> (B), and A<sub>2B</sub> (C) receptor mRNA expression in kidney tissue from male and female wildtype (WT), A<sub>1</sub>KO, A<sub>2A</sub>KO, and A<sub>2B</sub>KO Dahl SS rats. Total RNA was isolated from kidneys of wildtype, A<sub>1</sub>KO, A<sub>2A</sub>KO, and A<sub>2B</sub>KO Dahl SS rats (n=3 for each of the 8 sex/genotype combinations, total of 24 rats) using TRIZOL Reagent (Thermo Fisher Scientific; Waltham, MA) according to the manufacturer's instructions. The cDNA was synthesized using iScript™ cDNA synthesis kit (Bio-Rad). qPCR analysis was performed using Power SYBR Green PCR Master Mix (Thermo Fisher Scientific) in the Applied Biosystems QuantStudio 3 Real-Time PCR System (Thermo Fisher Scientific). Primers were: for *Adora1* 5'-tgctgtggatcgatacctcc-3' (forward) and 5'-tcttgctctaccacactcagg-3' (reverse); for *Adora2a* 5'-tgtacatcacgggtggagctg-3' (forward) and 5'-gatggatagcgaagggga-3' (reverse); for *Adora2b* 5'-tactttctggtgtccctggc-3' (forward) and 5'-cttgctcgtgtccagtgac-3' (reverse); for  $\beta$ -actin 5'-actctccagccttcctc-3' (forward) and 5'-atctccttctgcatcctgtc-3' (reverse). Threshold cycle (Ct) for  $\beta$ -actin was subtracted from Ct for target to calculate  $2^{\Delta Ct}$ , and results were expressed as % of control with control being the  $2^{\Delta Ct}$  for an arbitrarily chosen wildtype rat. Values are means  $\pm$  SEM. \*Indicates  $P < 0.05$  compared with corresponding males of same genotype.

**A** A<sub>1</sub> Receptor RNA Expression in Brain

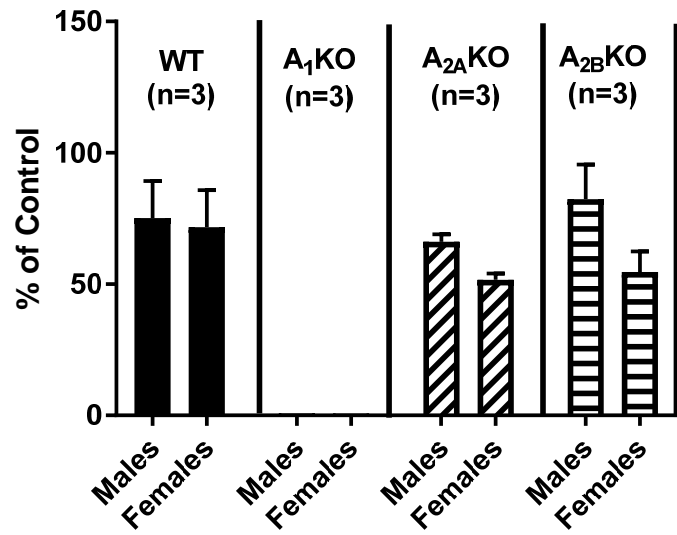

**B** A<sub>2A</sub> Receptor RNA Expression in Brain

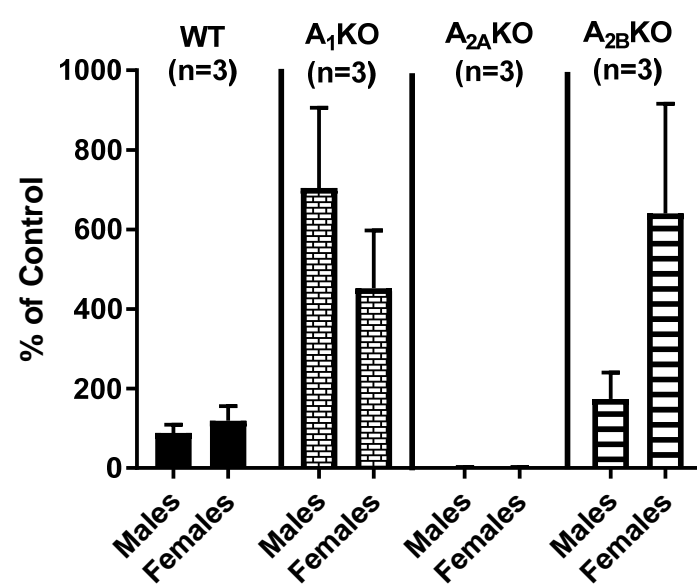

**C** A<sub>2B</sub> Receptor RNA Expression in Brain

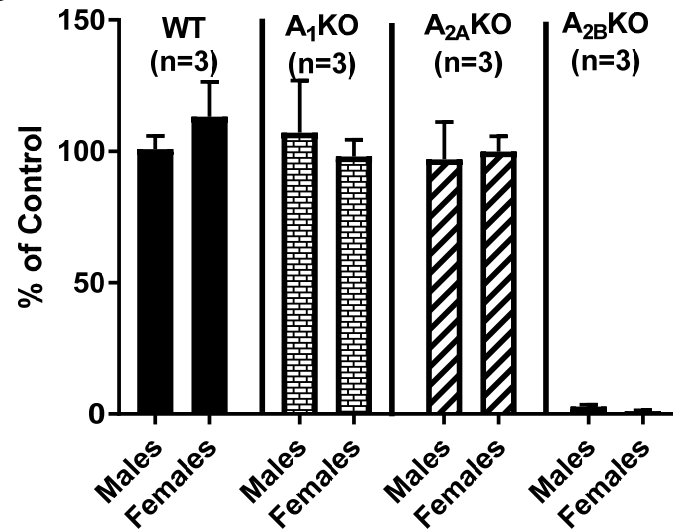

**Figure S8.** Figure summaries  $A_1$  (A),  $A_{2A}$  (B), and  $A_{2B}$  (C) receptor mRNA expression in brain tissue from male and female wildtype (WT),  $A_1$ KO,  $A_{2A}$ KO, and  $A_{2B}$ KO Dahl SS rats. Total RNA was isolated from brains of wildtype,  $A_1$ KO,  $A_{2A}$ KO, and  $A_{2B}$ KO Dahl SS rats (n=3 for each of the 8 sex/genotype combinations, total of 24 rats) using TRIZOL Reagent (Thermo Fisher Scientific; Waltham, MA) according to the manufacturer's instructions. The cDNA was synthesized using iScript™ cDNA synthesis kit (Bio-Rad). qPCR analysis was performed using Power SYBR Green PCR Master Mix (Thermo Fisher Scientific) in the Applied Biosystems QuantStudio 3 Real-Time PCR System (Thermo Fisher Scientific). Primers were: for *Adora1* 5'-tgctgtggatcgatacctcc-3' (forward) and 5'-tcttgctctaccacactcagg-3' (reverse); for *Adora2a* 5'-tgtacatcacgggtggagctg-3' (forward) and 5'-gatgggtgatagcgaagggga-3' (reverse); for *Adora2b* 5'-tactttctgggtgtccctggc-3' (forward) and 5'-cttgctcgtgtccagtgc-3' (reverse); for  $\beta$ -actin 5'-actctccagccttccttc-3' (forward) and 5'-atctccttctgcatcctgtc-3' (reverse). Threshold cycle (Ct) for  $\beta$ -actin was subtracted from Ct for target to calculate  $2^{\Delta Ct}$ , and results were expressed as % of control with control being the  $2^{\Delta Ct}$  for an arbitrarily chosen wildtype rat. Values are means  $\pm$  SEM.

# HEART RATE

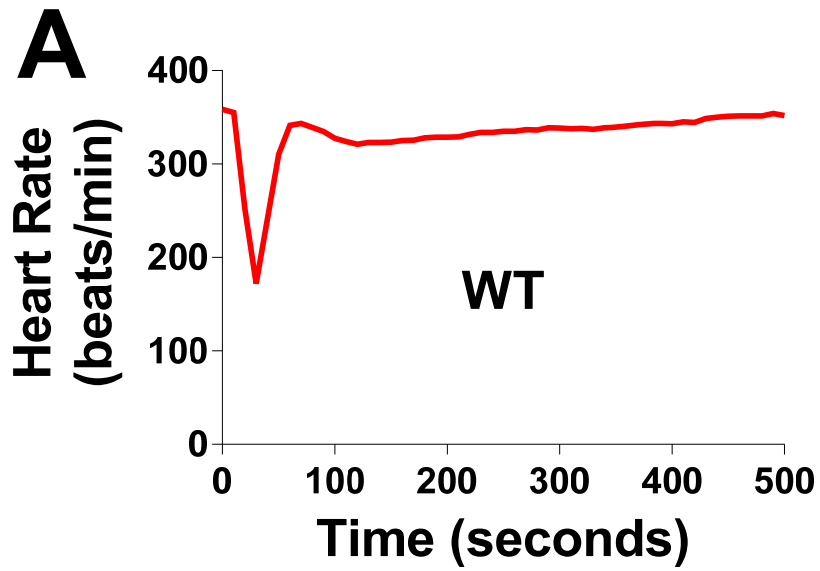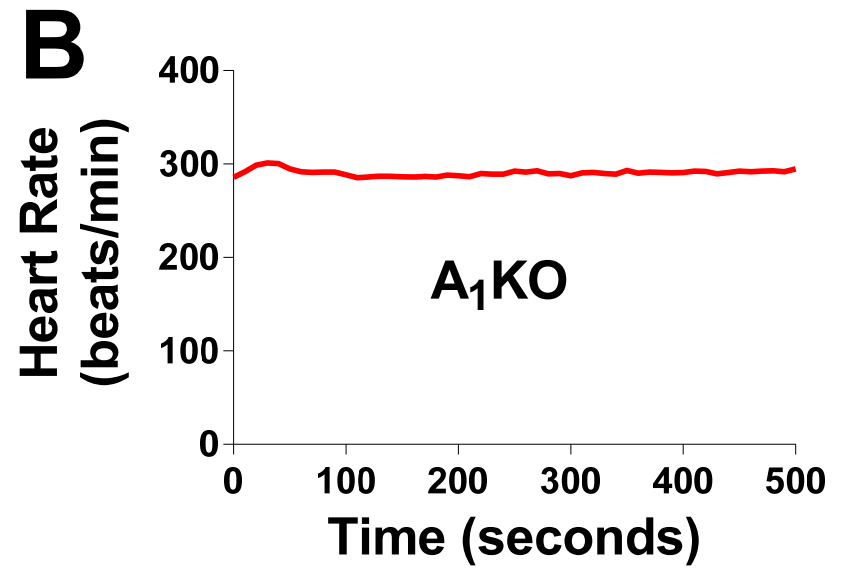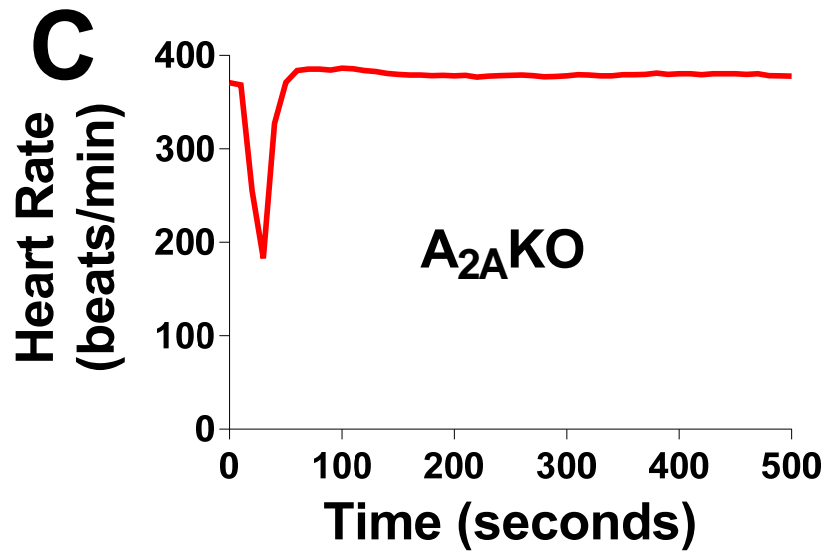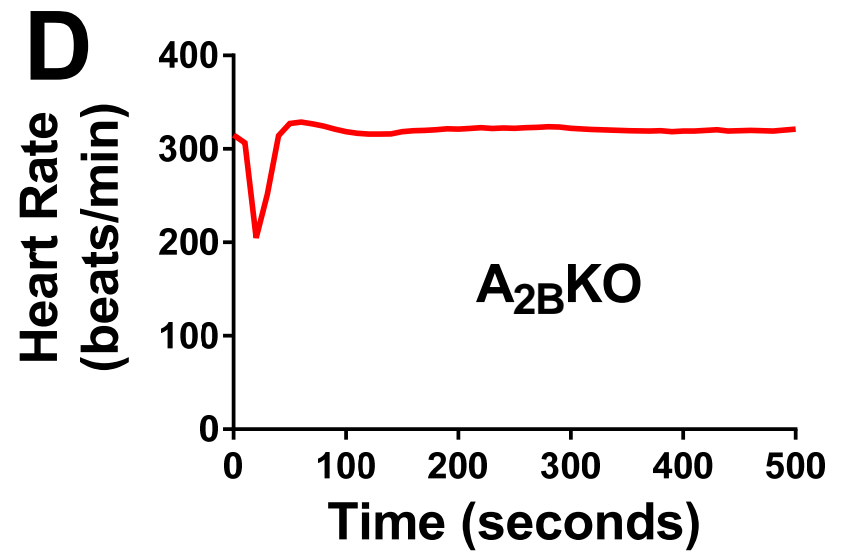

**Figure S9.** At time = 0, adenosine (3  $\mu$ moles/kg) was injected intravenously into wildtype (A, WT), A<sub>1</sub> knockout (B, A<sub>1</sub>KO), A<sub>2A</sub> knockout (C, A<sub>2A</sub>KO), and A<sub>2B</sub> knockout (D, A<sub>2B</sub>KO) Dahl SS rats while recording heart rate. The effect of adenosine on heart rate was abolished in A<sub>1</sub>KO rats.

# MEAN ARTERIAL BLOOD PRESSURE

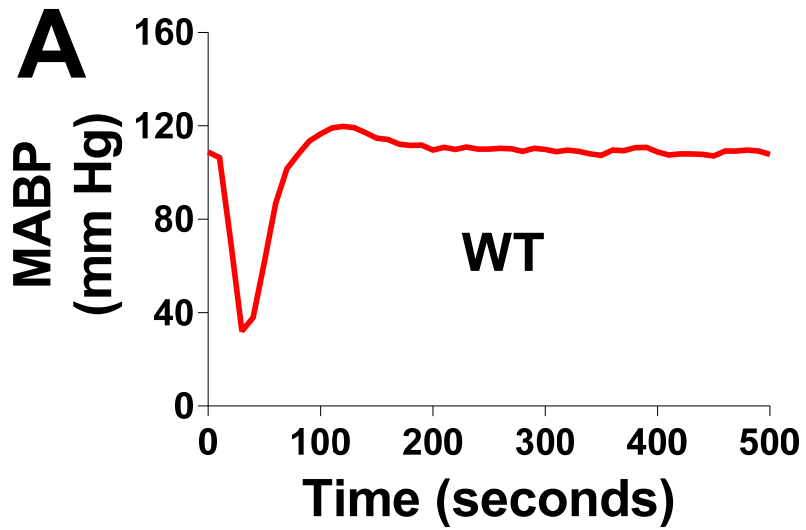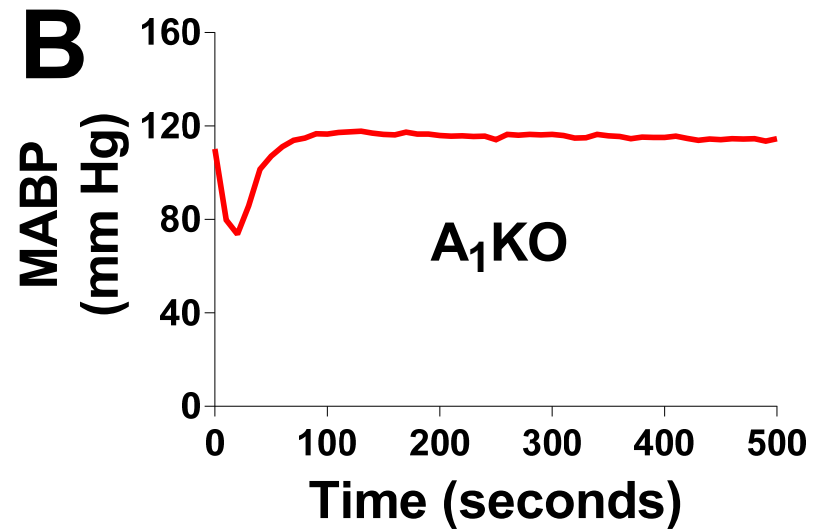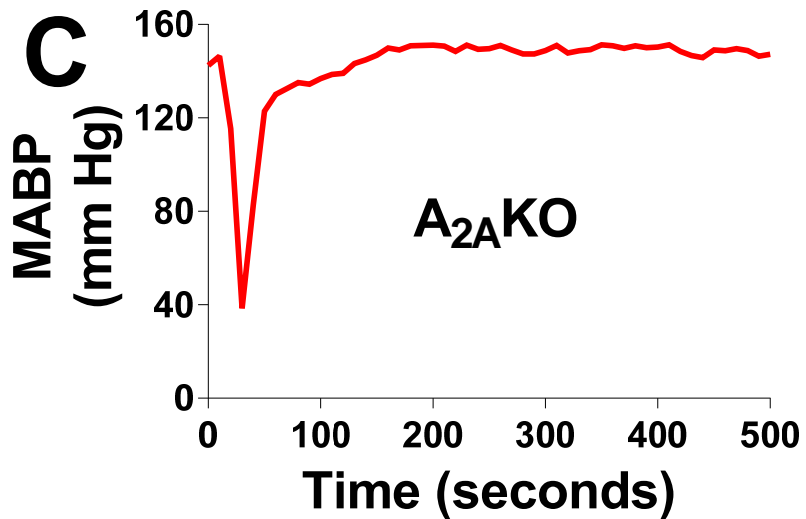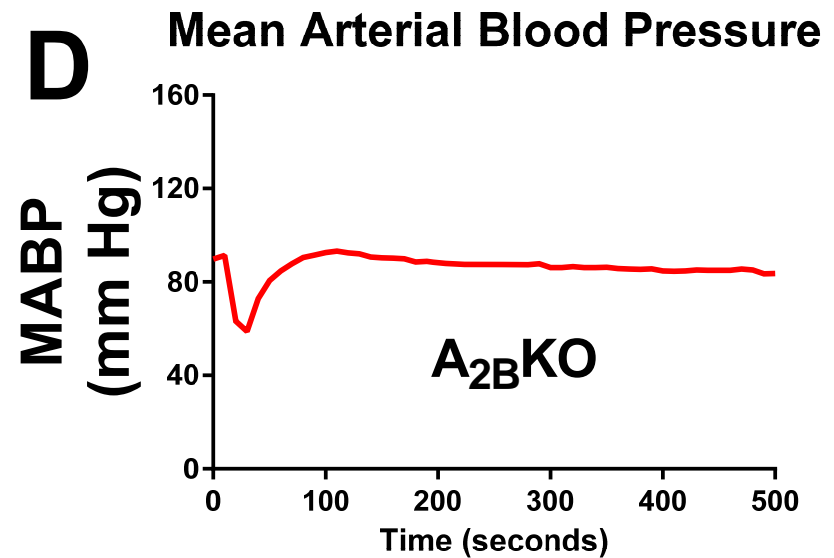

**Figure S10.** At time = 0, adenosine (3  $\mu$ moles/kg) was injected intravenously into wildtype (A, WT), A<sub>1</sub> knockout (B, A<sub>1</sub>KO), A<sub>2A</sub> knockout (C, A<sub>2A</sub>KO), and A<sub>2B</sub> knockout (D, A<sub>2B</sub>KO) Dahl SS rats while recording mean arterial blood pressure (MABP). Adenosine reduced blood pressure in all four strains.

# RENAL VASCULAR RESISTANCE

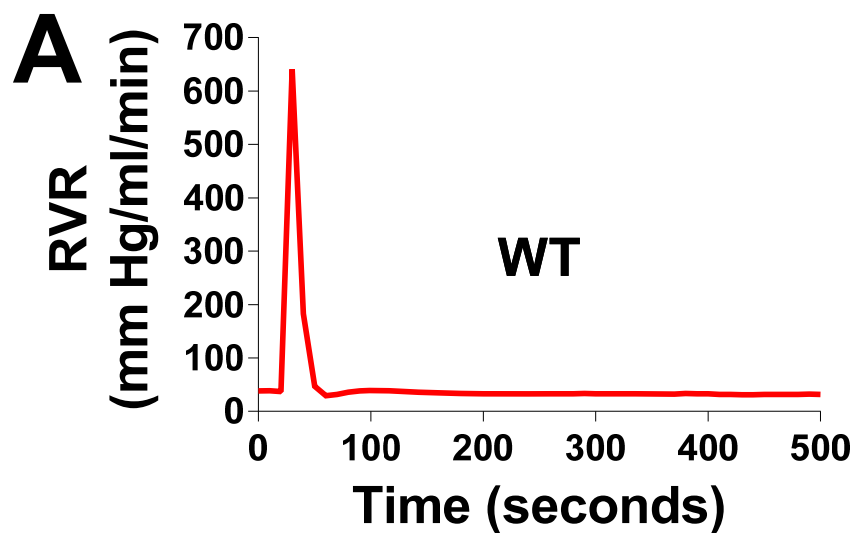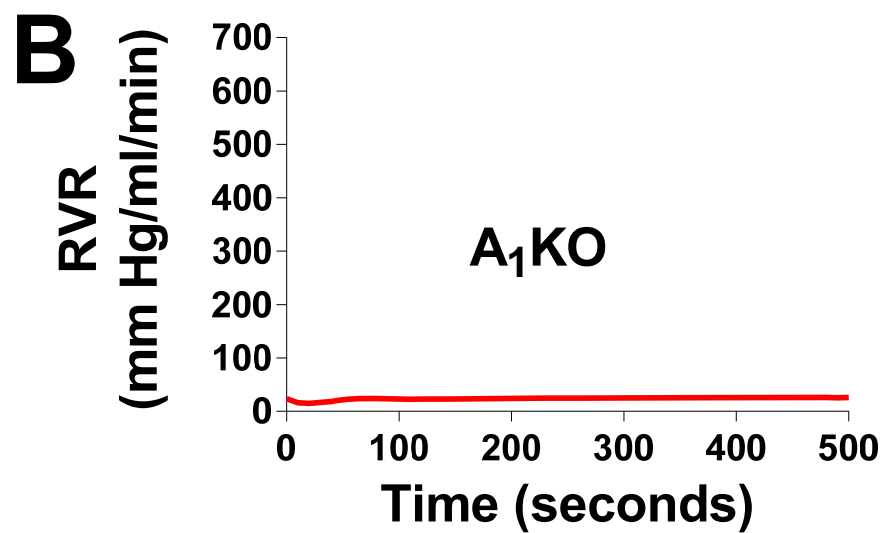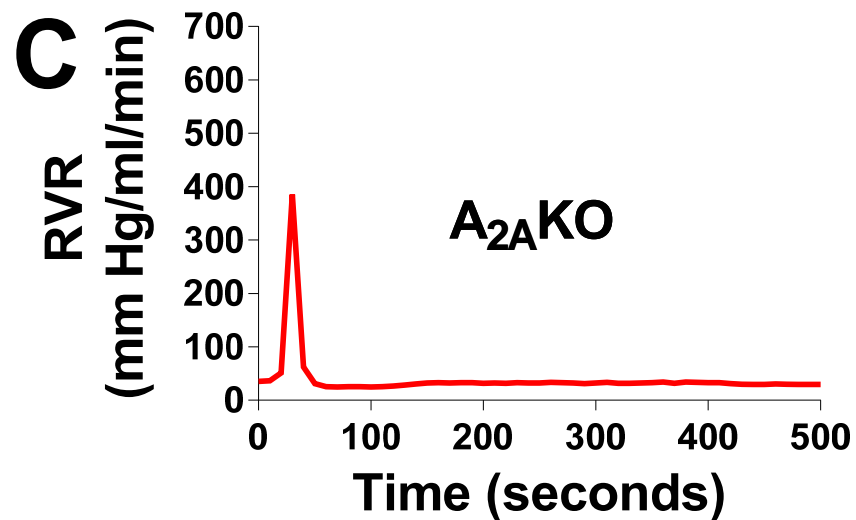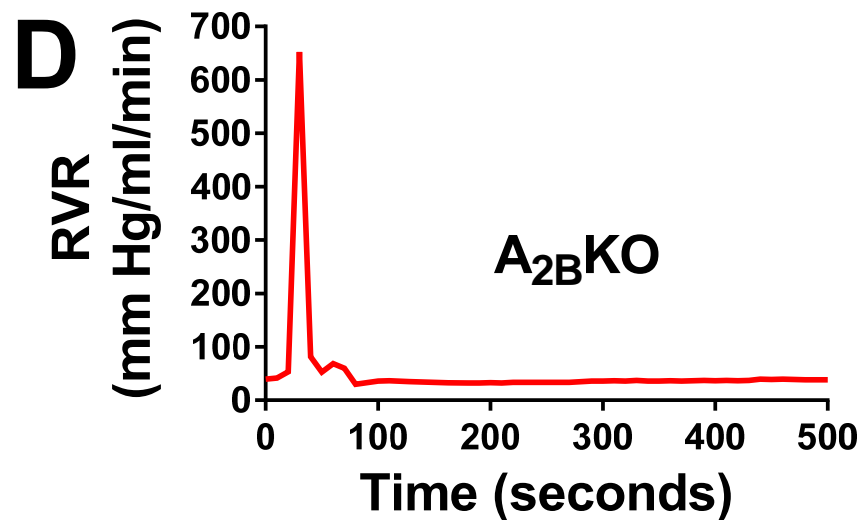



**Figure S11.** At time = 0, adenosine (3  $\mu$ moles/kg) was injected intravenously into wildtype (A, WT), A<sub>1</sub> knockout (B, A<sub>1</sub>KO), A<sub>2A</sub> knockout (C, A<sub>2A</sub>KO), and A<sub>2B</sub> knockout (D, A<sub>2B</sub>KO) Dahl SS rats while recording renal vascular resistance (RVR = mean arterial blood pressure divided by renal blood flow). The ability of adenosine to spike RVR was abolished in A<sub>1</sub>KO rats.

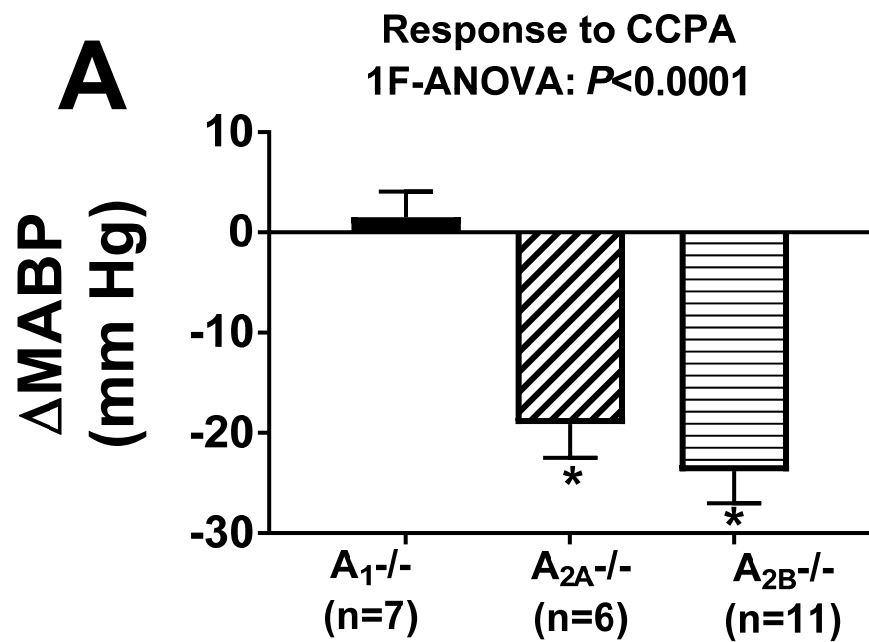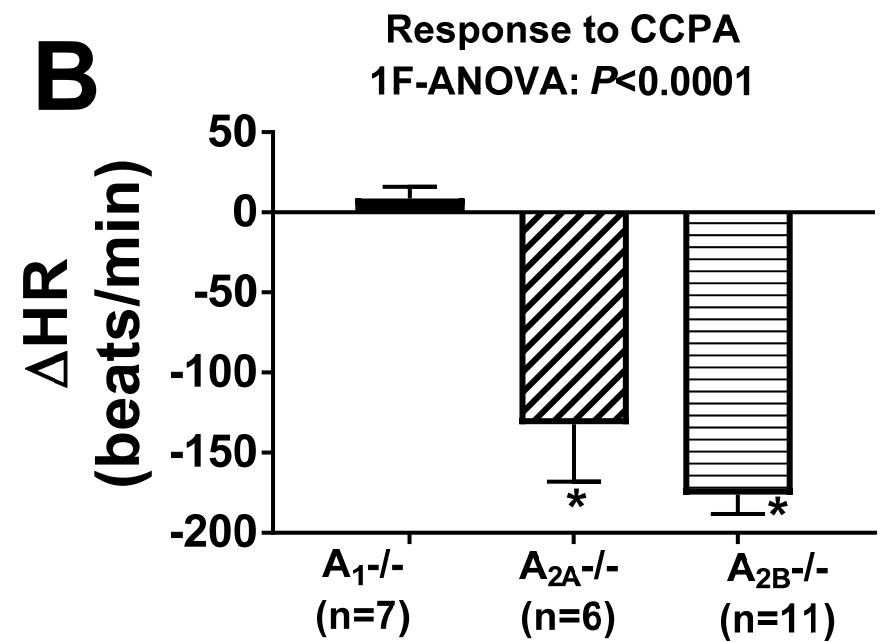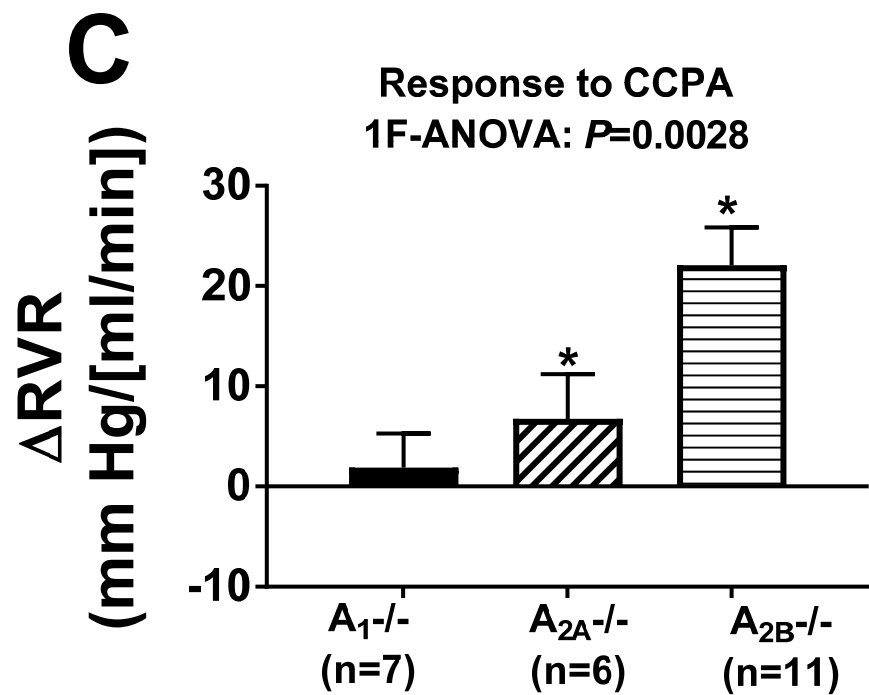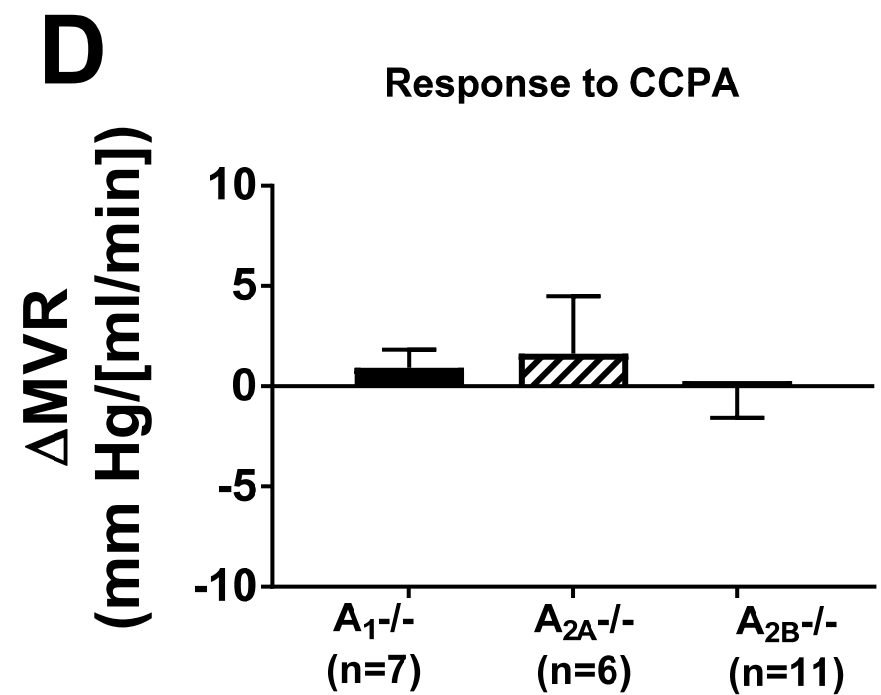

**Figure S12.** To further characterize the  $A_1$ ,  $A_{2A}$ , and  $A_{2B}$  knockout (-/-) Dahl SS rats, we infused intravenously 2-chloro- $N^6$ -cyclopentyladenosine (CCPA; selective  $A_1$  receptor agonist; 1  $\mu\text{g}/\text{kg}/\text{min}$ ) while monitoring mean arterial blood pressure (MABP, A), heart rate (HR, B), renal vascular resistance (RVR = MABP/renal blood flow, C) and mesenteric vascular resistance (MVR = MABP/mesenteric blood flow, D). As show, in  $A_{2A}$  and  $A_{2B}$  knockout rats, CCPA reduced MABP and HR and increased RVR; and these responses were abolished in  $A_1$  knockout rats. Values are means  $\pm$  SEM.

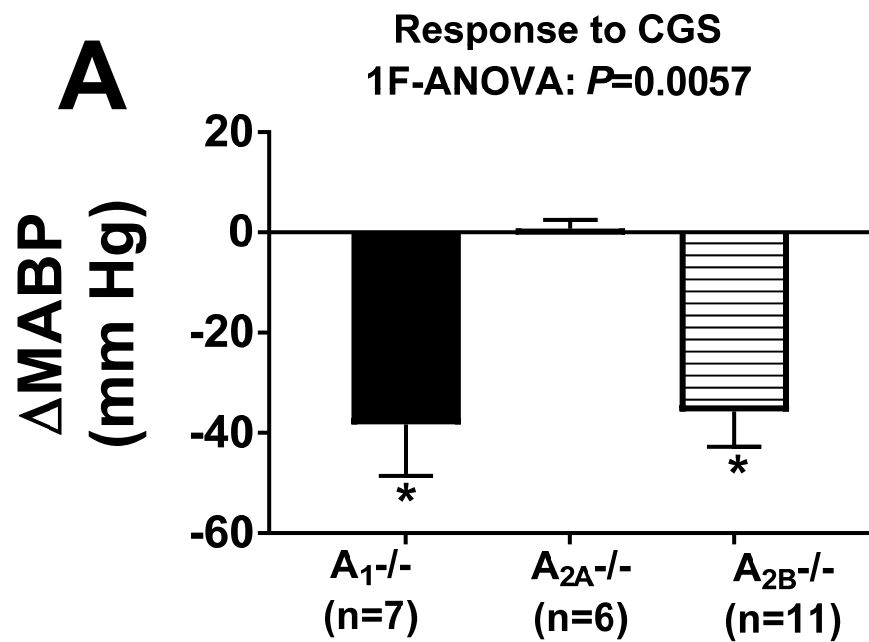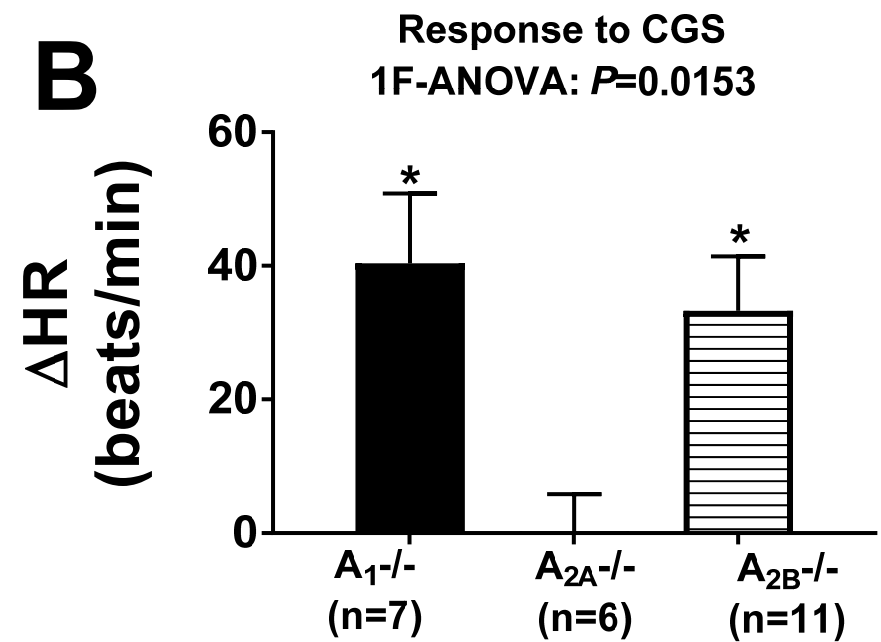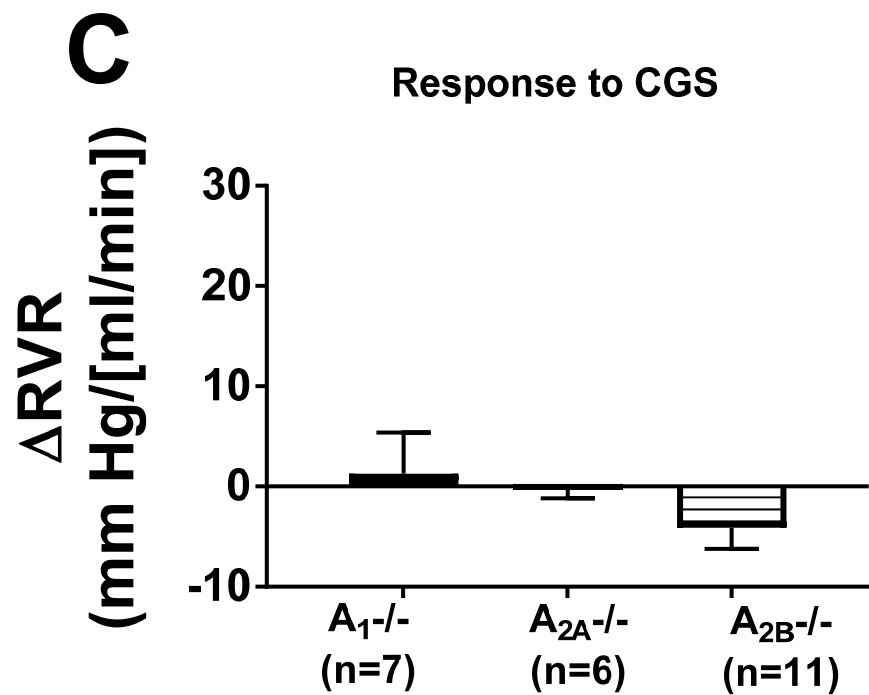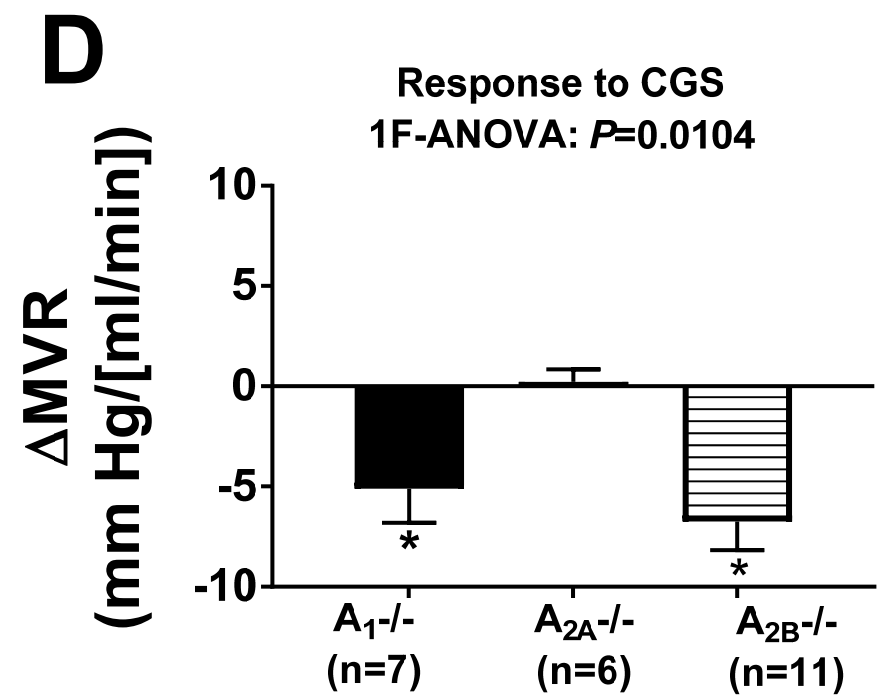

**Figure S13.** To further characterize the  $A_1$ ,  $A_{2A}$ , and  $A_{2B}$  knockout (-/-) Dahl SS rats, we infused intravenously CGS21680 (selective  $A_{2A}$  receptor agonist; 1  $\mu\text{g}/\text{kg}/\text{min}$ ) while monitoring mean arterial blood pressure (MABP, A), heart rate (HR, B), renal vascular resistance (RVR = MABP/renal blood flow, C) and mesenteric vascular resistance (MVR = MABP/mesenteric blood flow, D). As show, in  $A_1$  knockout and  $A_{2B}$  knockout rats, CGS21680 reduced MABP and HR and decreased MVR; and these responses were abolished in  $A_1$  knockout rats. Values are means  $\pm$  SEM.

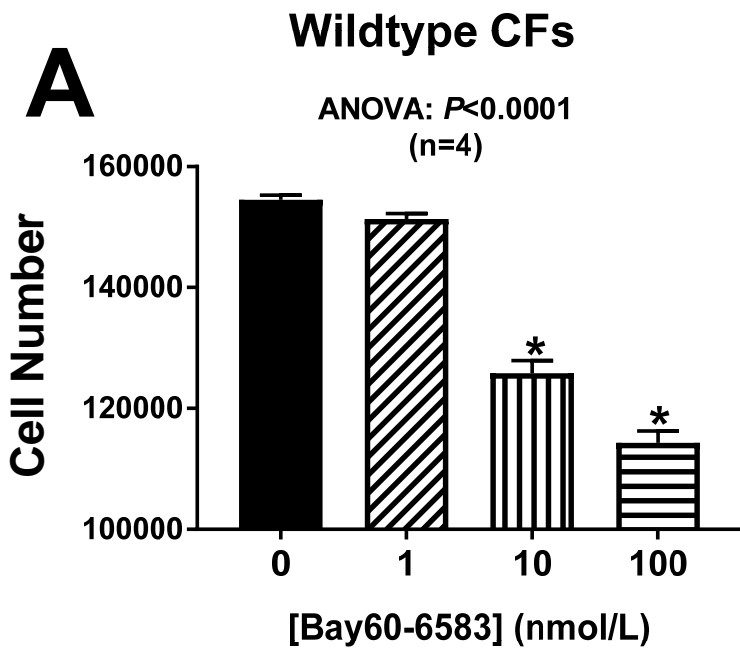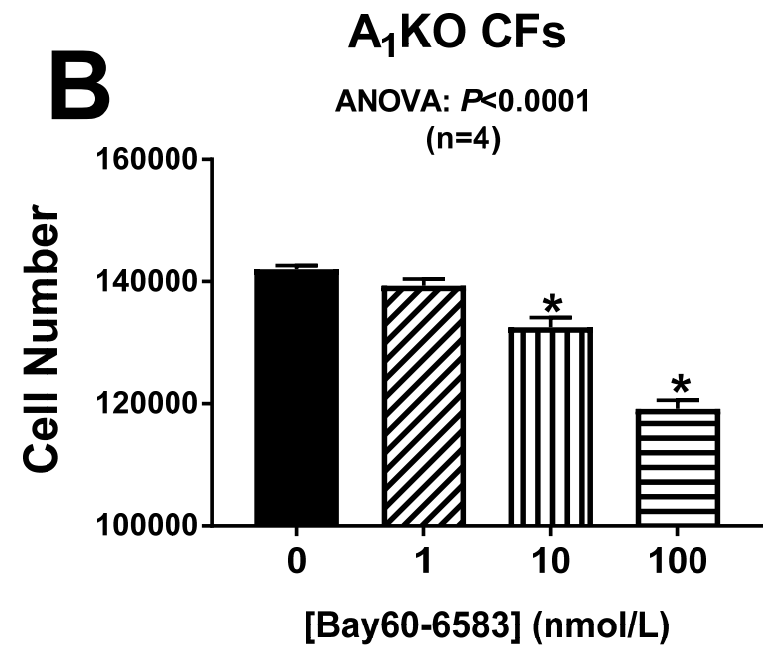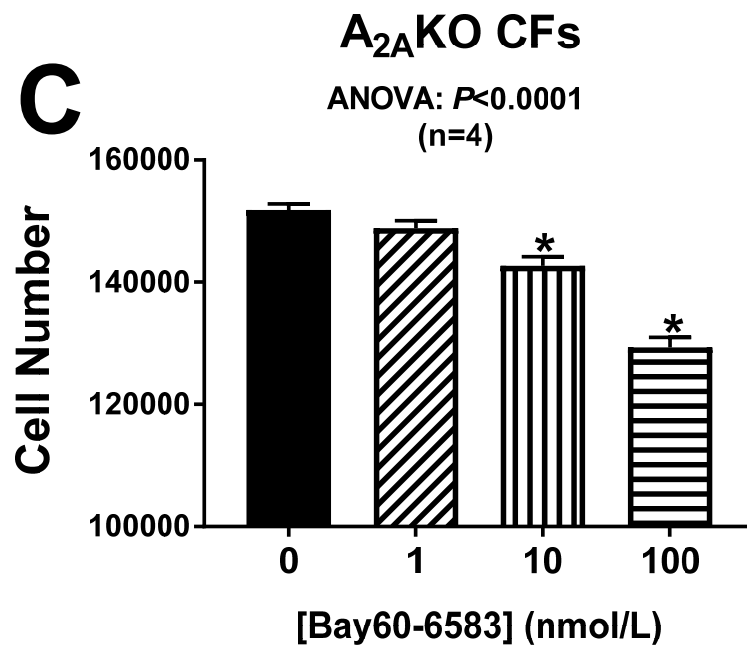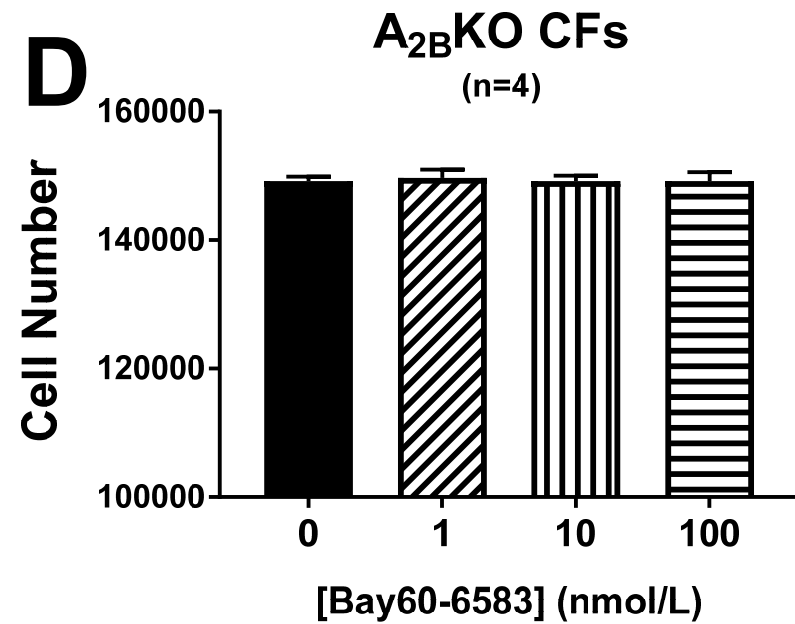

**Figure S14.** Bar graphs illustrate the effects of the selective  $A_{2B}$  receptor agonist (Bay60-6583) on proliferation of cardiac fibroblasts (CFs) cultured from the hearts of wildtype (A),  $A_1$  receptor knockout (B),  $A_{2A}$  receptor knockout (C), and  $A_{2B}$  receptor knockout (D) rats. Data were analyzed by 1-factor analysis of variance (ANOVA), with specific contrasts using Bonferroni tests (\*indicates  $P < 0.05$  versus corresponding "0" concentration of Bay60-6583). Values are means  $\pm$  SEM.

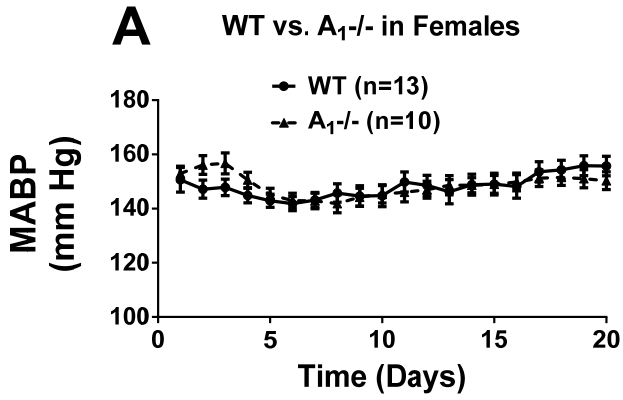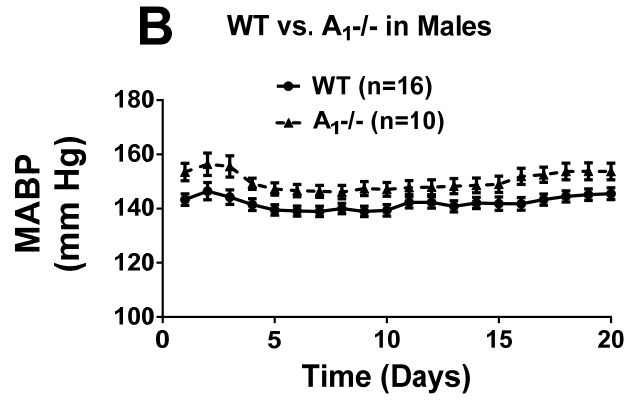

**C** Baseline MABP (20-Day Average) in  $A_1$ KOs vs WT Males and Females

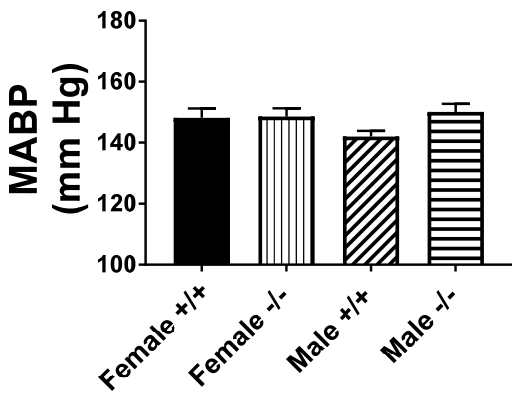

**D** Baseline SBP (20-Day Average) in  $A_1$ KOs vs WT Males and Females

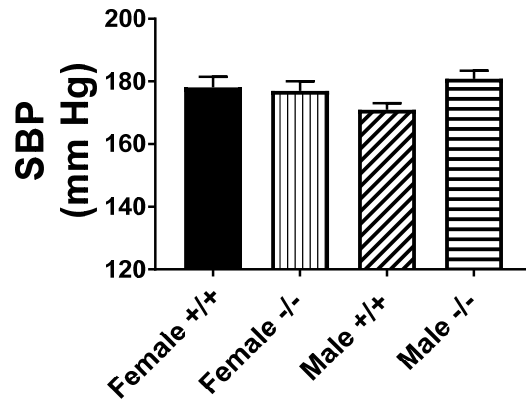

**E** Baseline DBP (20-Day Average) in  $A_1$ KOs vs WT Males and Females

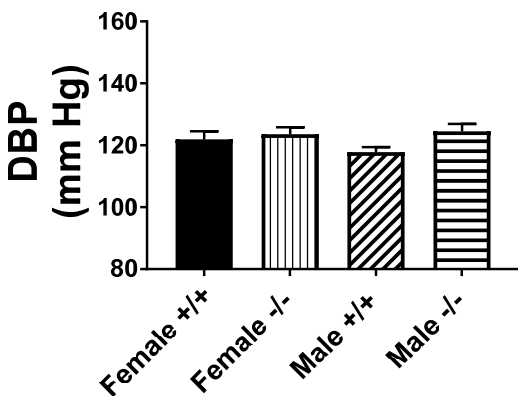

**F** Baseline HR (20-Day Average) in  $A_1$ KOs vs WT Males and Females

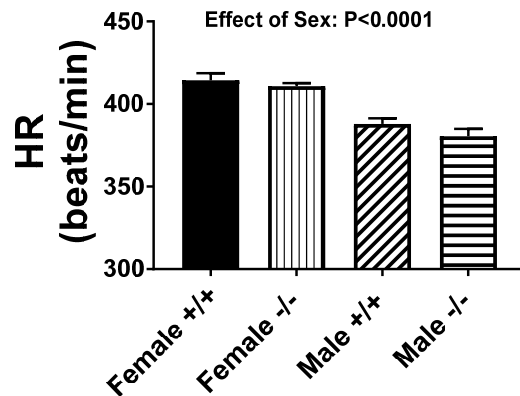



**Figure S15.** Panels A and B illustrate the day-to-day profile for 20 days of baseline (i.e., on 0.3% salt diet) mean arterial blood pressure (MABP) in wildtype Dahl SS rats (WT) versus  $A_1$  knockout Dahl SS rats ( $A_1^{-/-}$ ). Panels A, B, C, and D summarize the 20-day average MABP (C), systolic blood pressure (SBP, D), diastolic blood pressure (DBP, E), and heart rate (HR, F) in female and male wildtype (+/+) versus  $A_1$  knockout (-/-) Dahl SS rats. Values are means  $\pm$  SEM.

**A** WT vs.  $A_{2B}^{-/-}$  in Females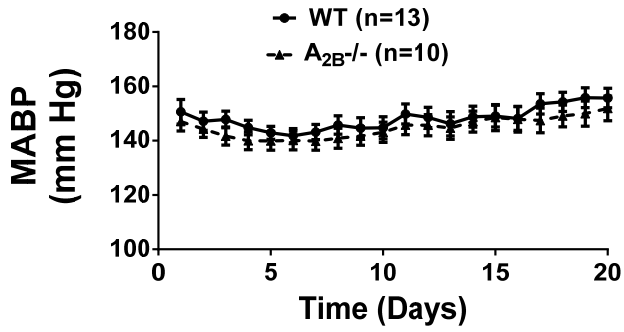**B** WT vs.  $A_{2B}^{-/-}$  in Males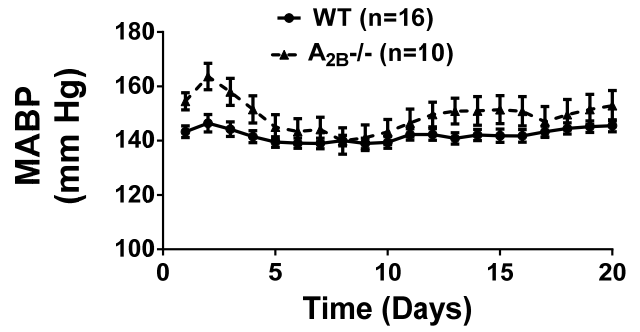**C**Baseline MABP (20-Day Average) in  $A_{2B}$ KOs vs WT Males and Females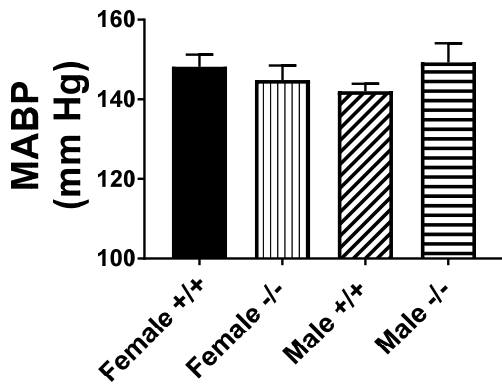**D**Baseline SBP (20-Day Average) in  $A_{2B}$ KOs vs WT Males and Females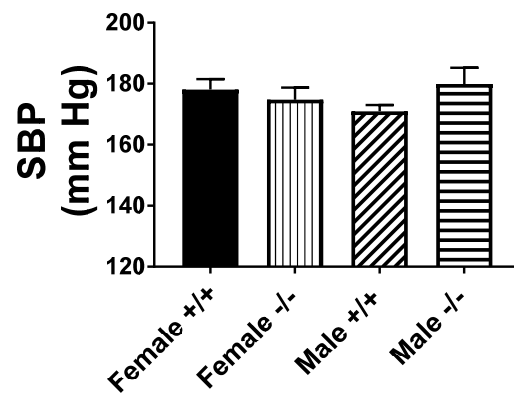**E**Baseline DBP (20-Day Average) in  $A_{2B}$ KOs vs WT Males and Females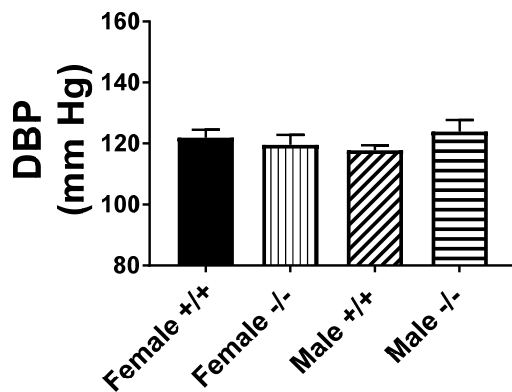**F**Baseline HR (20-Day Average) in  $A_{2B}$ KOs vs WT Males and Females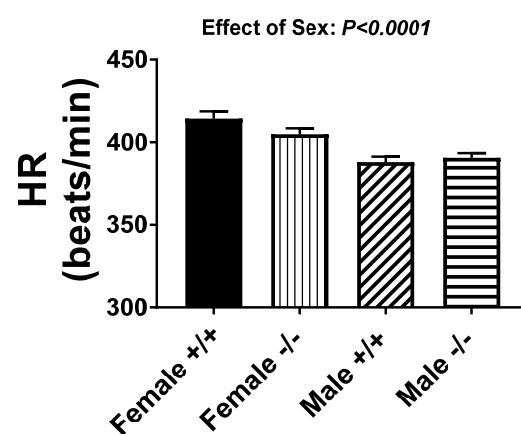

**Figure S16.** Panels A and B illustrate the day-to-day profile for 20 days of baseline (i.e., on 0.3% salt diet) mean arterial blood pressure (MABP) in wildtype Dahl SS rats (WT) versus  $A_{2B}$  knockout Dahl SS rats ( $A_{1-/-}$ ). Panels A, B, C, and D summarize the 20-day average MABP (C), systolic blood pressure (SBP, D), diastolic blood pressure (DBP, E), and heart rate (HR, F) in female and male wildtype (+/+) versus  $A_{2B}$  knockout (-/-) Dahl SS rats. Values are means  $\pm$  SEM.

**A****4% Salt Diet on DBP**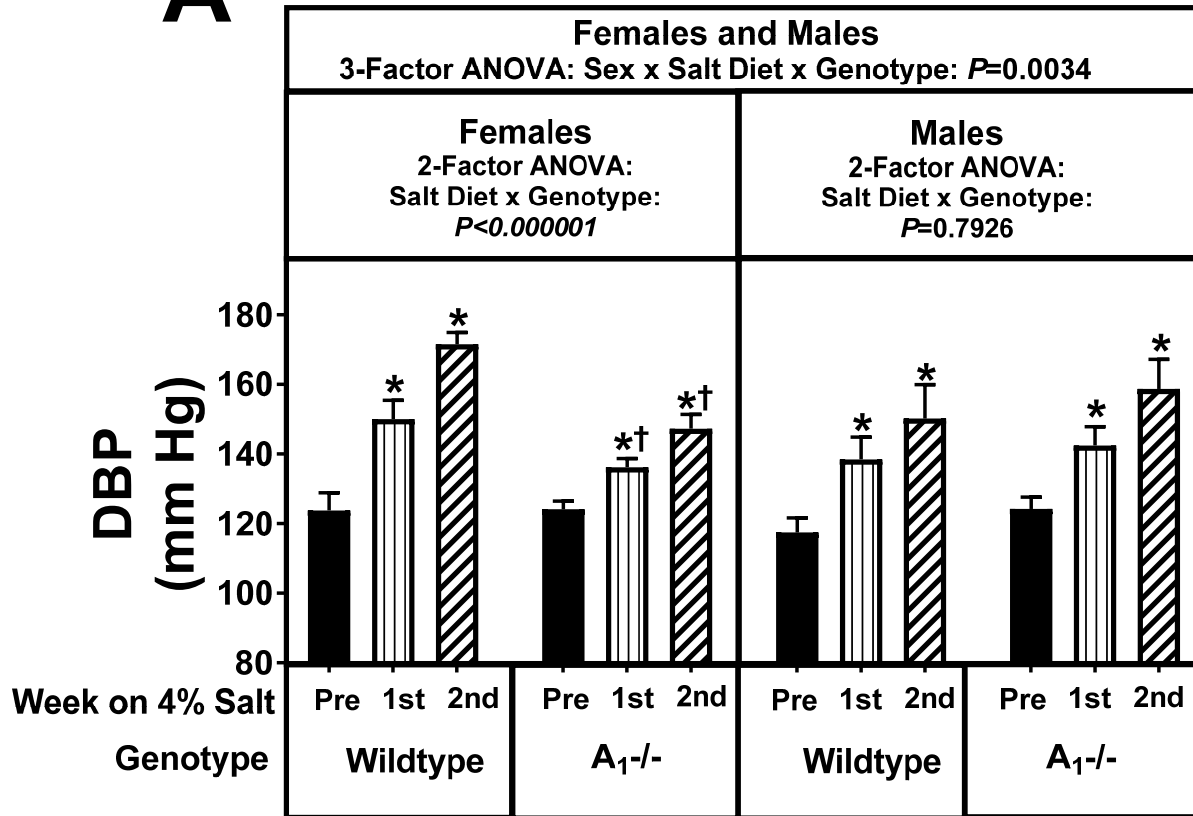**B****4% Salt Diet on HR**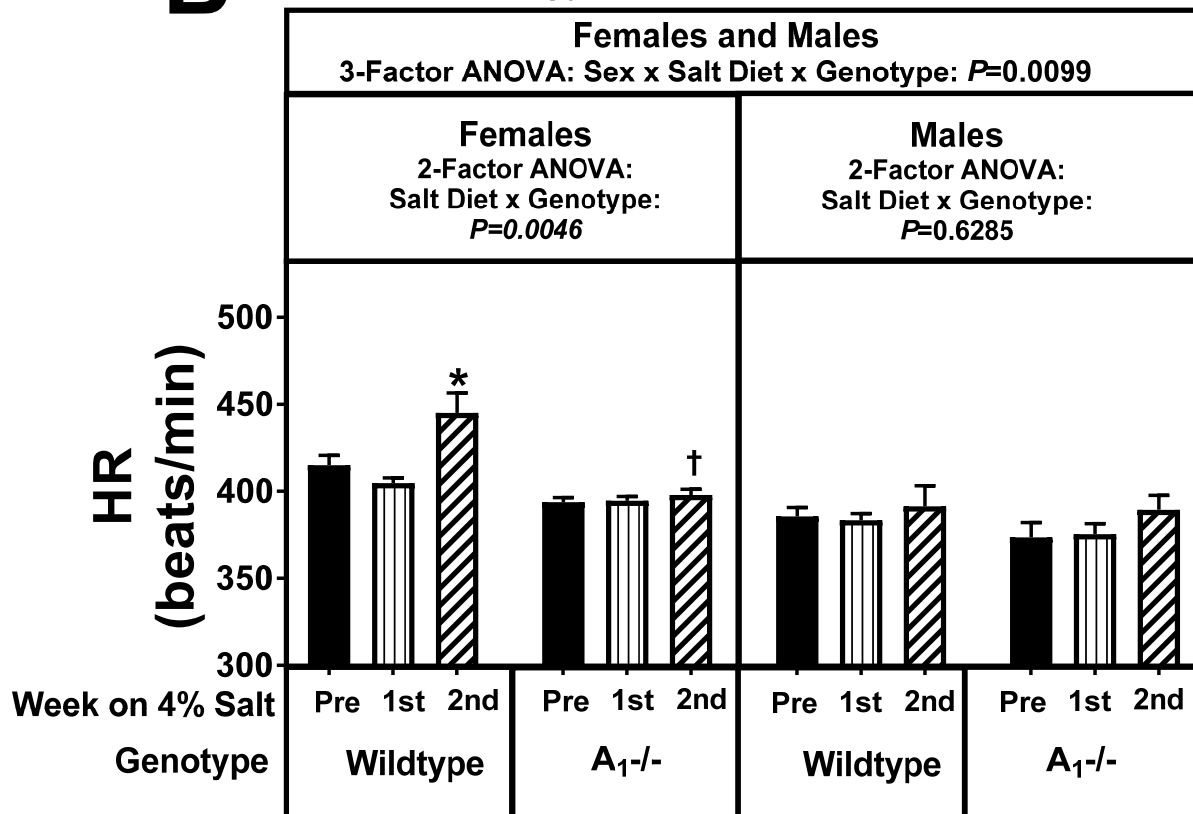

**Figure S17.** Panel A summarizes for both female and male  $A_1$  knockout (-/-) and wildtype Dahl SS rats the weekly average diastolic blood pressure (DBP) before (pre) starting the 4% salt diet and then during the 1<sup>st</sup> and 2<sup>nd</sup> weeks of the 4% salt diet. Panel B provides the same information and analysis as panel A, but for heart rate (HR). Data were analyzed by 2-factor and 3-factor analysis of variance (ANOVA), with specific contrasts using Bonferroni tests (\*indicates  $P < 0.05$  versus corresponding “pre” period; †indicates  $P < 0.05$  versus corresponding period in wildtype). Values are means  $\pm$  SEM.

**A** WT vs.  $A_1^{-/-}$  in Females  
 ● WT on 8% Salt Diet (n=7)  
 ▲  $A_1^{-/-}$  Females on 8% Salt Diet (n=5)

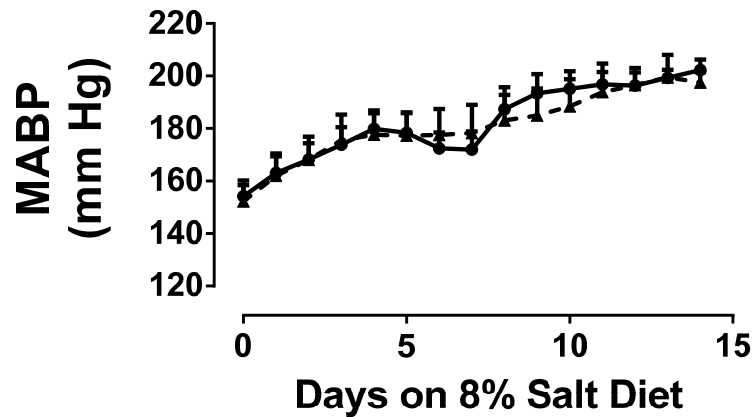

**B** WT vs.  $A_1^{-/-}$  in Males  
 ● WT on 8% Salt Diet (n=10)  
 ▲  $A_1^{-/-}$  Males on 8% Salt Diet (n=5)

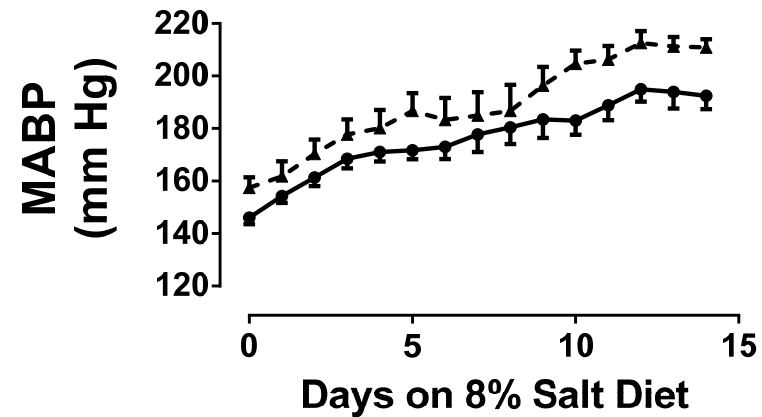

**C** 8% Salt Diet on MABP

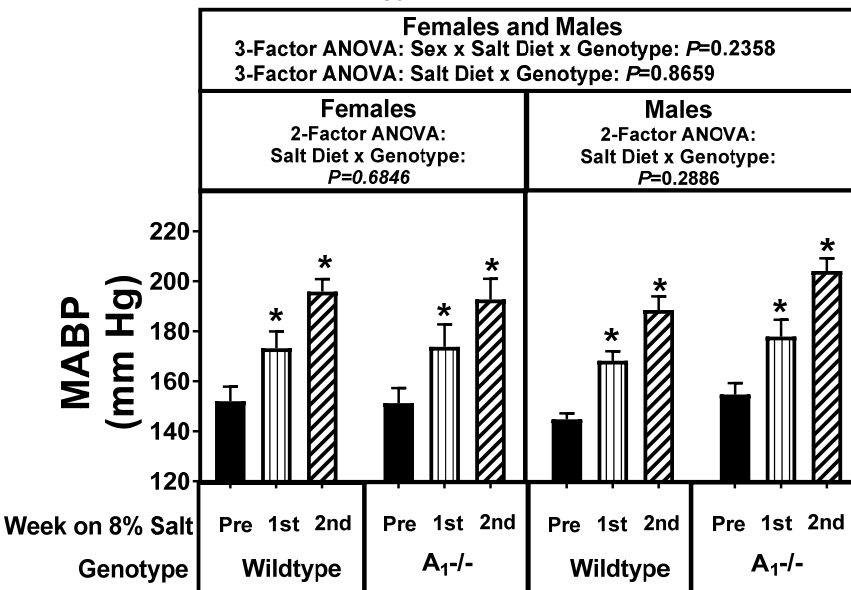

**D** 8% Salt Diet on SBP

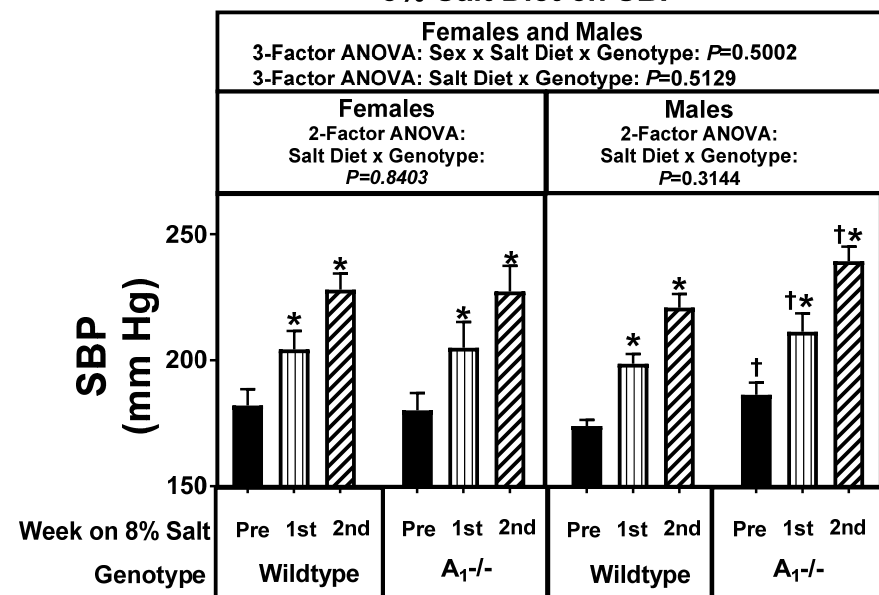

**Figure S18.** Panel A illustrates the effects of a 8% salt diet on daily mean arterial blood pressure (MABP) in female wild-type Dahl SS rats (WT) versus female  $A_1$  knockout Dahl SS rats ( $A_1^{-/-}$ ); panel B reports the effects of 8% salt diet on daily MABP in male WT versus male  $A_1^{-/-}$  Dahl SS rats. Panel C summarizes for both females and males the weekly average MABP before (pre) starting the 8% salt diet and then during the 1<sup>st</sup> and 2<sup>nd</sup> weeks of the 8% salt diet. Panel D provides the same information and analysis as panel C for systolic blood pressure (SBP). Data were analyzed by 2-factor and 3-factor analysis of variance (ANOVA), with specific contrasts using Bonferroni tests (\*indicates  $P < 0.05$  versus corresponding “pre” period; †indicates  $P < 0.05$  versus corresponding period in wildtype). Values are means  $\pm$  SEM.

**A****8% Salt Diet on DBP**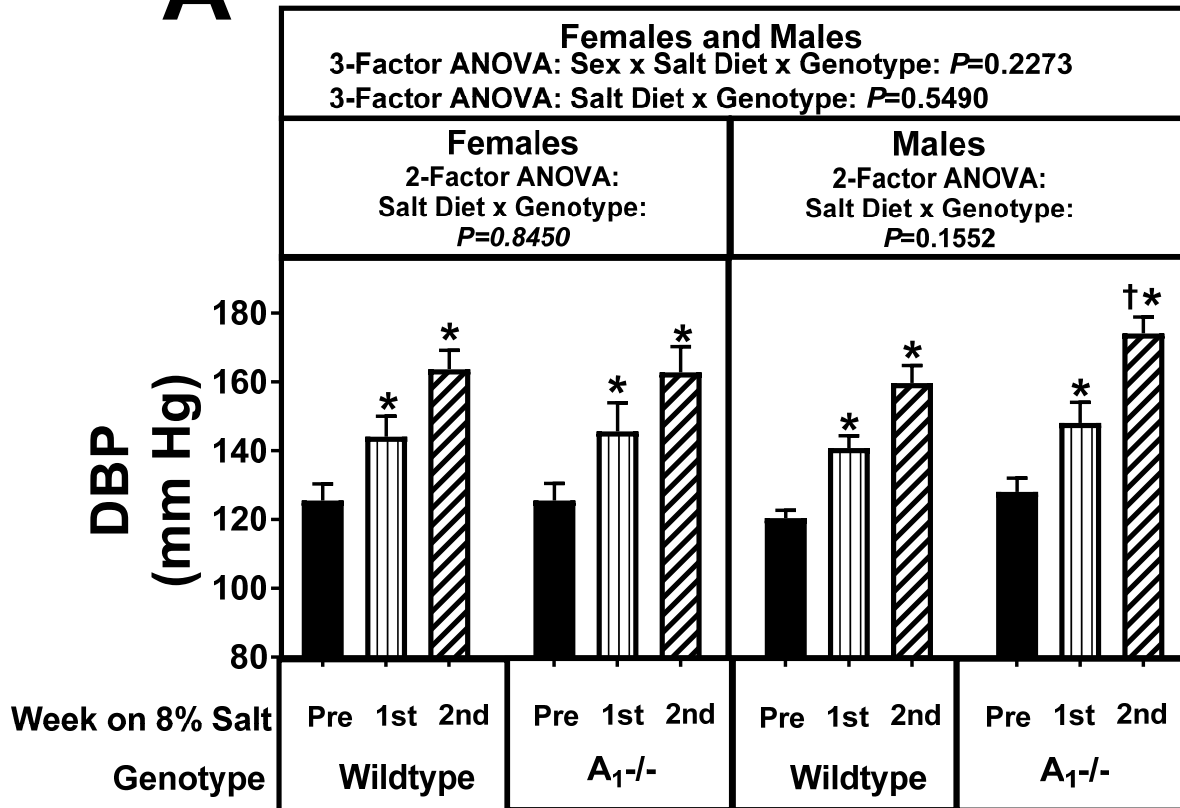**B****8% Salt Diet on HR**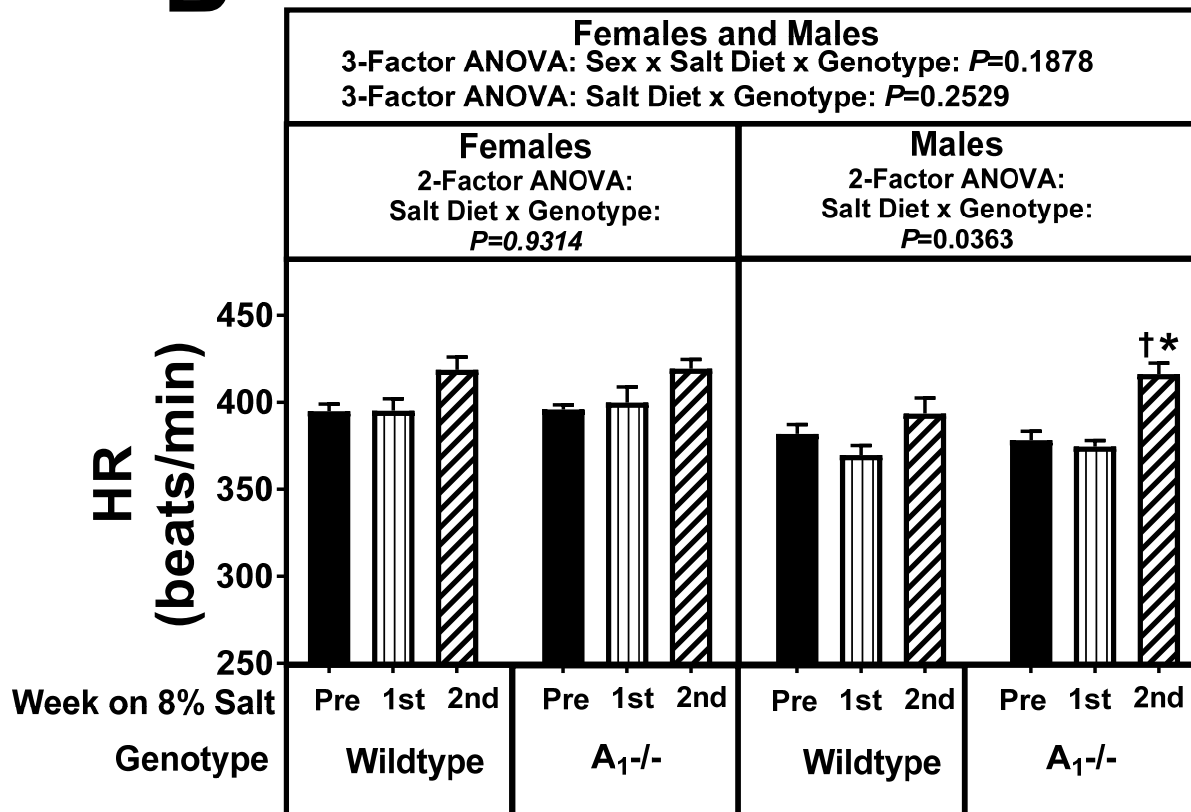



**Figure S19.** Panel A summarizes for both female and male  $A_1$  knockout (-/-) and wildtype Dahl SS rats the weekly average diastolic blood pressure (DBP) before (pre) starting the 8% salt diet and then during the 1<sup>st</sup> and 2<sup>nd</sup> weeks of the 8% salt diet. Panel B provides the same information and analysis as panel A, but for heart rate (HR). Data were analyzed by 2-factor and 3-factor analysis of variance (ANOVA), with specific contrasts using Bonferroni tests (\*indicates  $P < 0.05$  versus corresponding “pre” period; †indicates  $P < 0.05$  versus corresponding period in wildtype). Values are means  $\pm$  SEM.

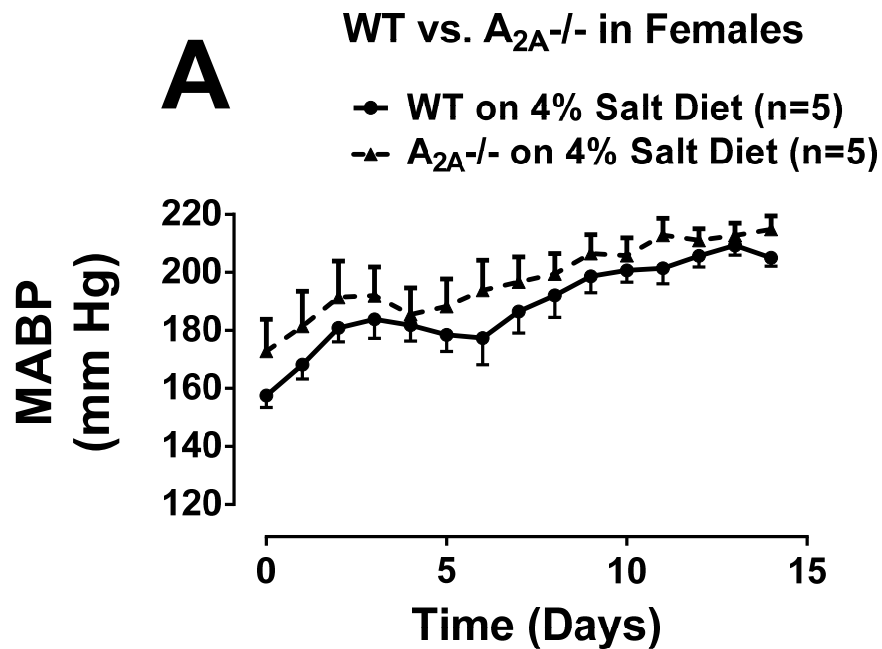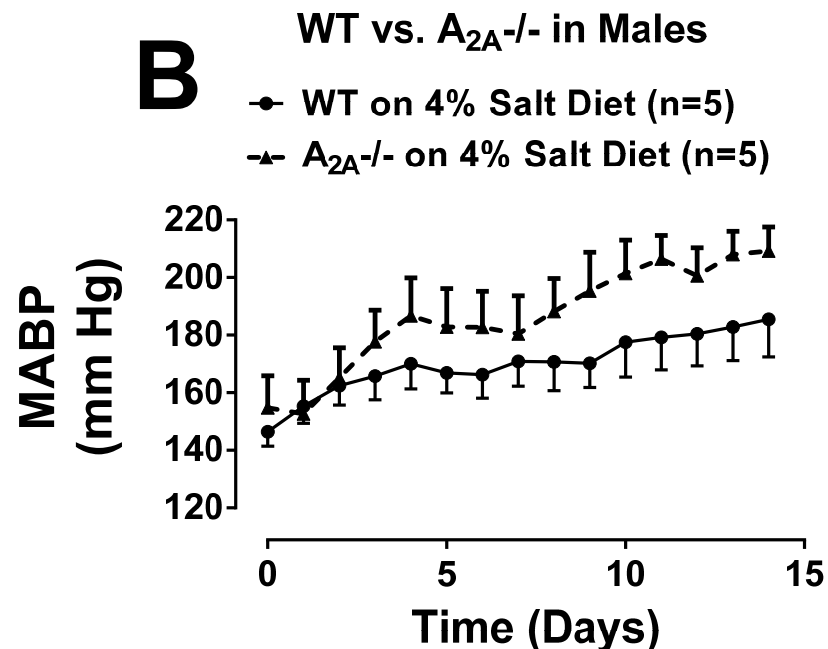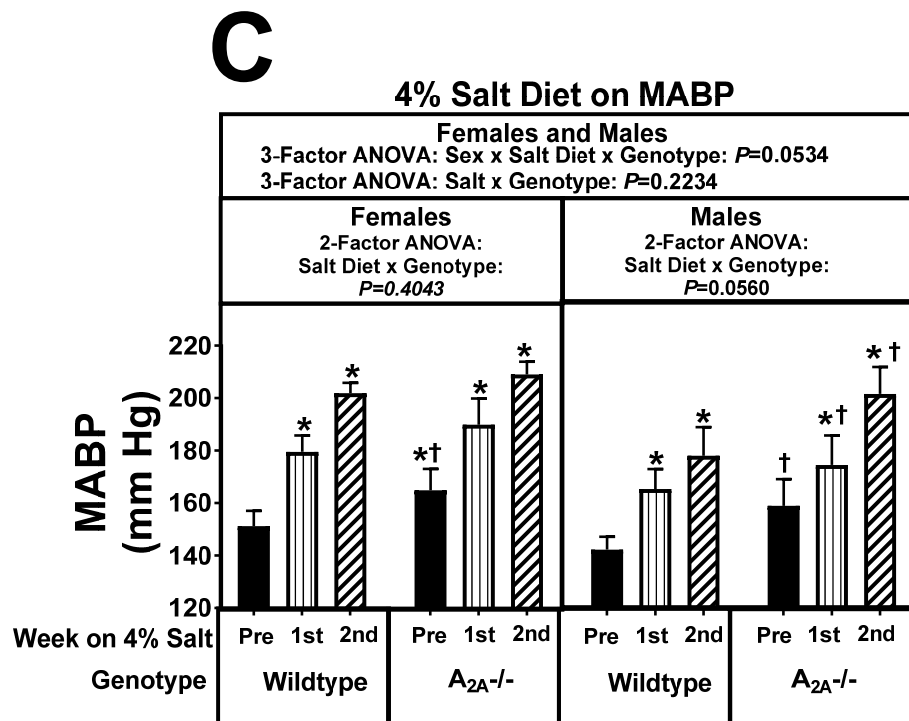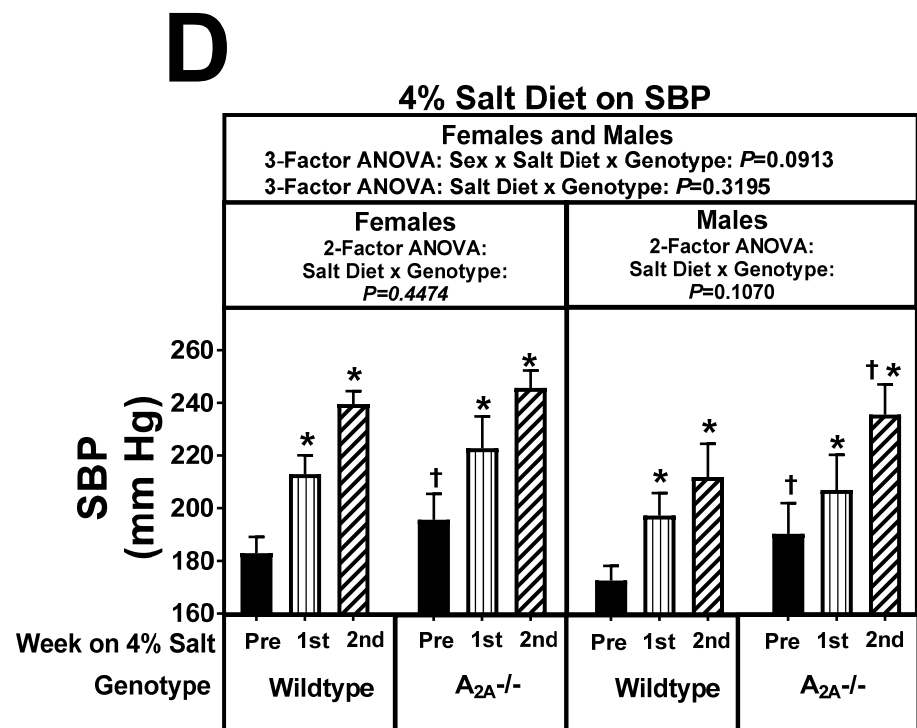

**Figure S20.** Panel A illustrates the effects of a 4% salt diet on daily mean arterial blood pressure (MABP) in female wildtype Dahl SS rats (WT) versus female  $A_{2A}$  knockout Dahl SS rats ( $A_{2A}^{-/-}$ ); panel B reports the effects of 4% salt diet on daily MABP in male WT versus male  $A_{2A}^{-/-}$  Dahl SS rats. Panel C summarizes for both females and males the weekly average MABP before (pre) starting the 4% salt diet and then during the 1<sup>st</sup> and 2<sup>nd</sup> weeks of the 4% salt diet. Panel D provides the same information and analysis as panel C for systolic blood pressure (SBP). Data were analyzed by 2-factor and 3-factor analysis of variance (ANOVA), with specific contrasts using Bonferroni tests (\*indicates  $P < 0.05$  versus corresponding “pre” period; †indicates  $P < 0.05$  versus corresponding period in wildtype). Values are means  $\pm$  SEM.

**A****4% Salt Diet on DBP**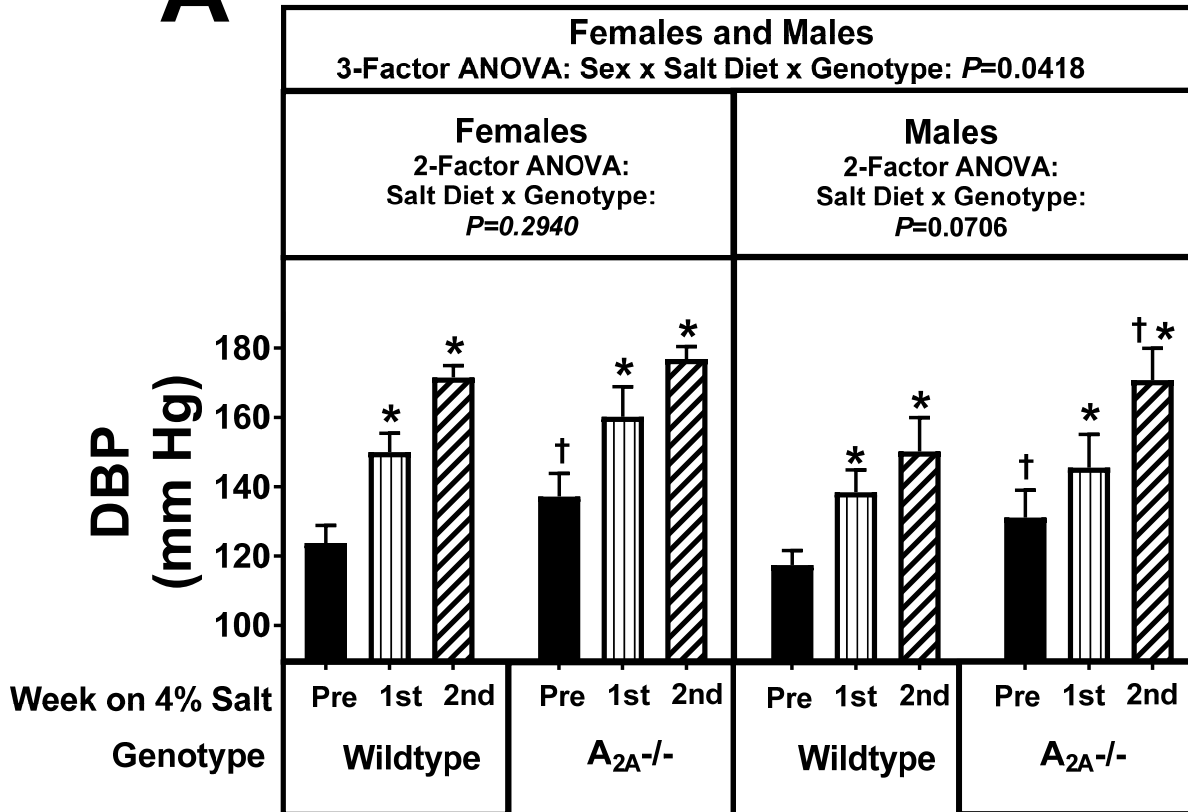**B****4% Salt Diet on HR**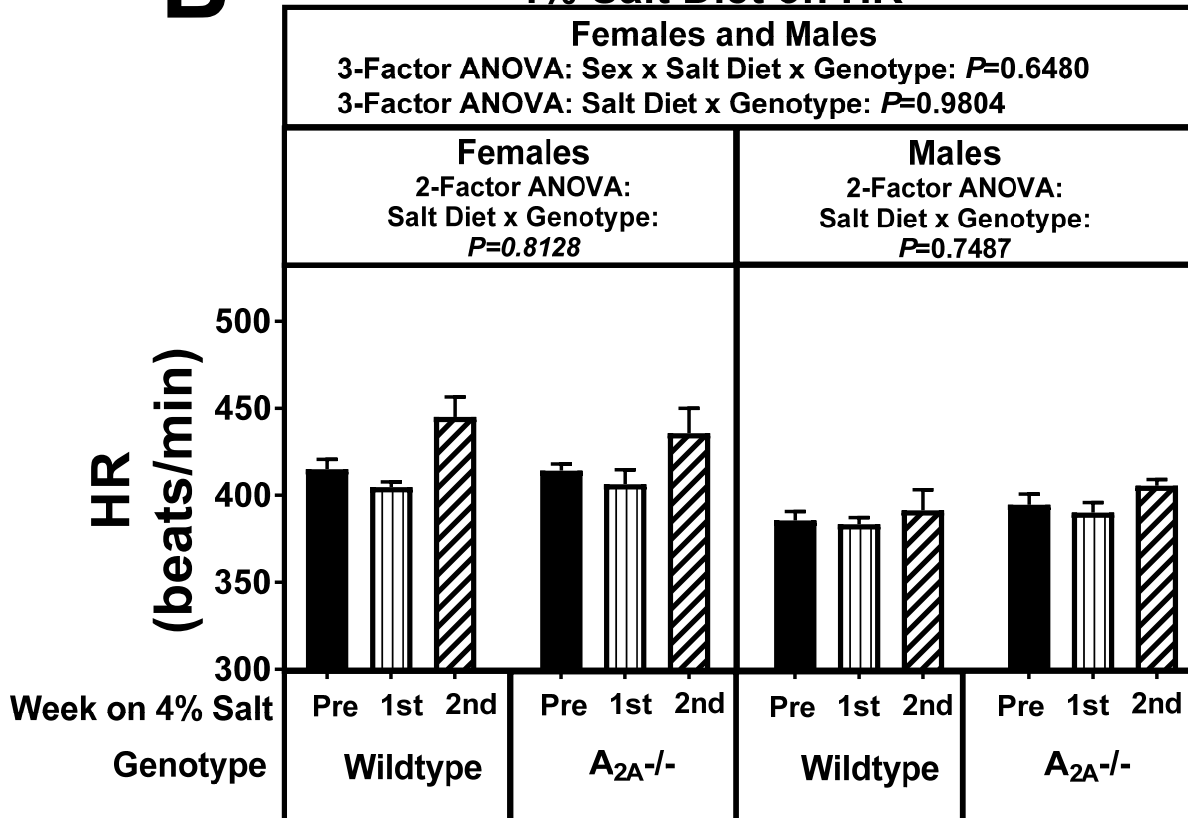

**Figure S21.** Panel A summarizes for both female and male  $A_{2A}$  knockout (-/-) and wildtype Dahl SS rats the weekly average diastolic blood pressure (DBP) before (pre) starting the 4% salt diet and then during the 1<sup>st</sup> and 2<sup>nd</sup> weeks of the 4% salt diet. Panel B provides the same information and analysis as panel A, but for heart rate (HR). Data were analyzed by 2-factor and 3-factor analysis of variance (ANOVA), with specific contrasts using Bonferroni tests (\*indicates  $P < 0.05$  versus corresponding “pre” period; †indicates  $P < 0.05$  versus corresponding period in wildtype). Values are means  $\pm$  SEM.

**A****4% Salt Diet on DBP**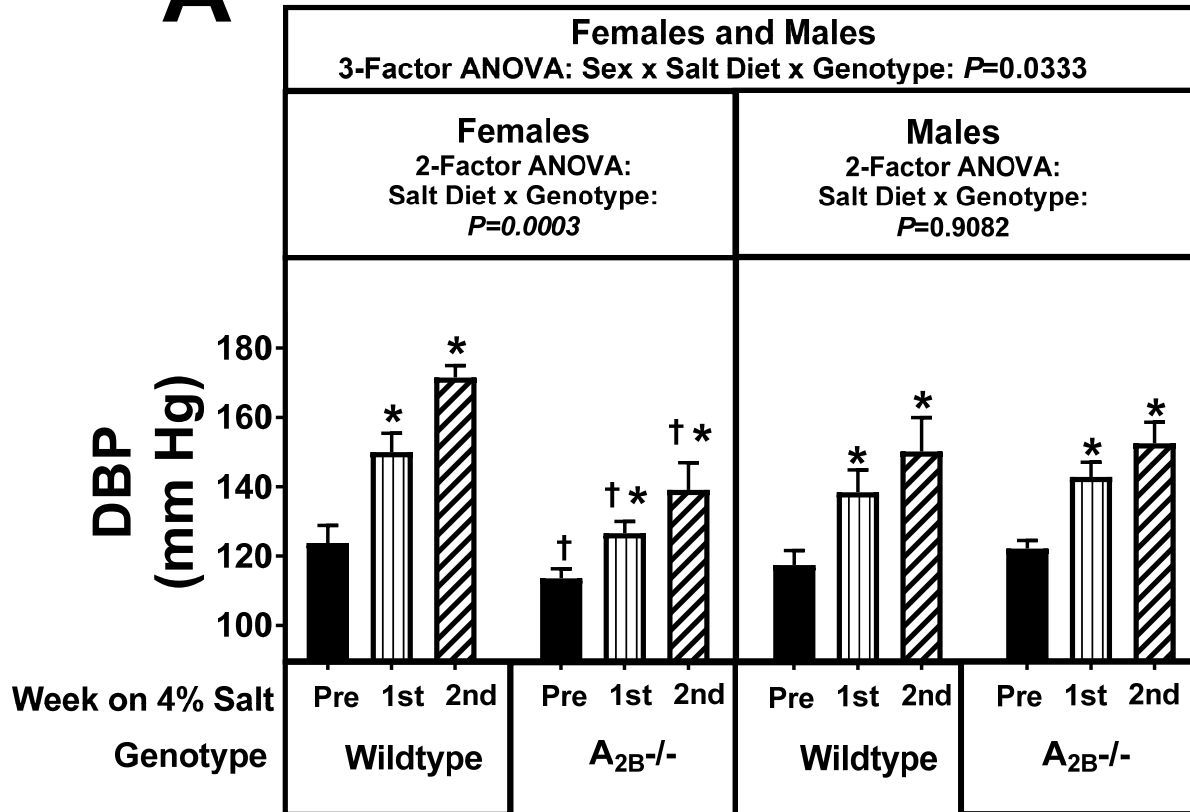**B****4% Salt Diet on HR**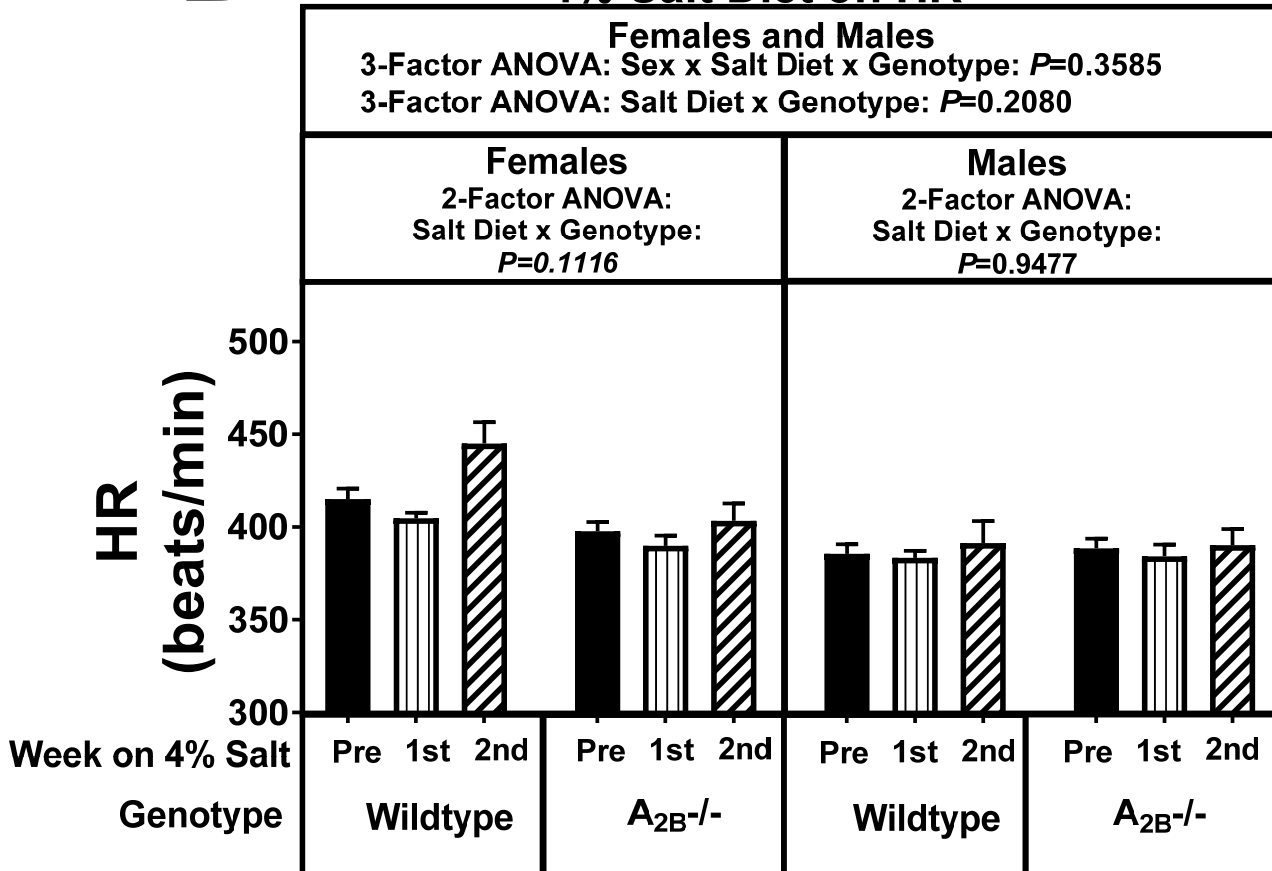

**Figure S22.** Panel A summarizes for both female and male A<sub>2B</sub> knockout (-/-) and wildtype Dahl SS rats the weekly average diastolic blood pressure (DBP) before (pre) starting the 4% salt diet and then during the 1<sup>st</sup> and 2<sup>nd</sup> weeks of the 4% salt diet. Panel B provides the same information and analysis as panel A, but for heart rate (HR). Data were analyzed by 2-factor and 3-factor analysis of variance (ANOVA), with specific contrasts using Bonferroni tests (\*indicates  $P < 0.05$  versus corresponding “pre” period; †indicates  $P < 0.05$  versus corresponding period in wildtype). Values are means  $\pm$  SEM.

### A WT vs. $A_{2B}^{-/-}$ in Females and Males

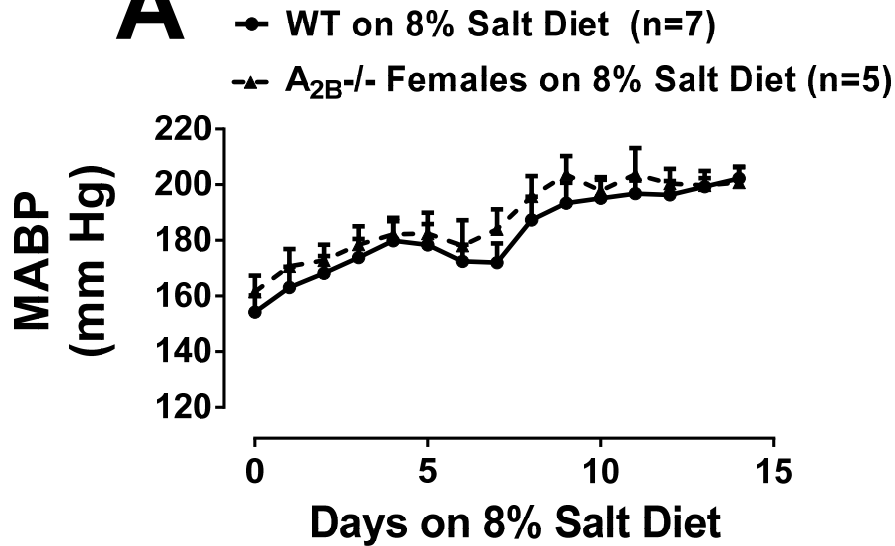

### B WT vs. $A_{2B}^{-/-}$ in Females and Males

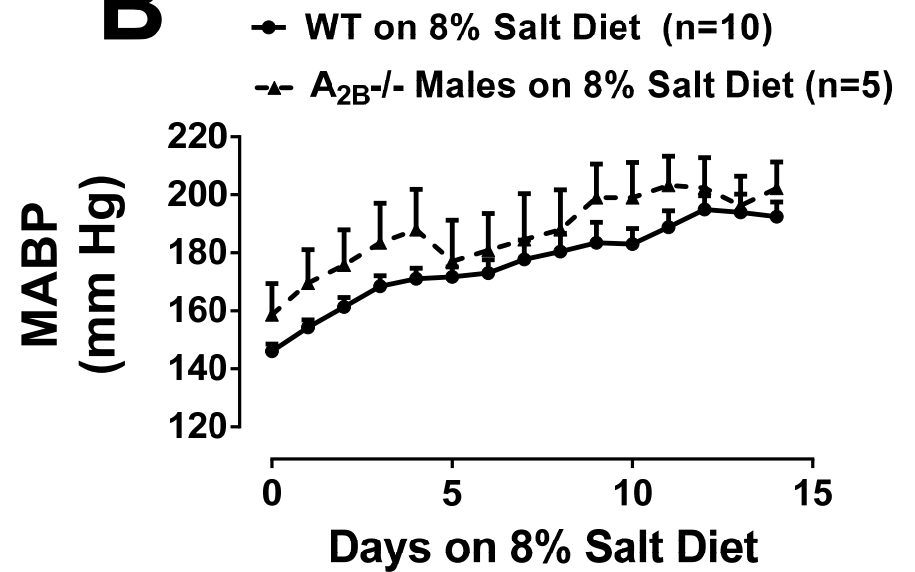

### C

#### 8% Salt Diet on MABP

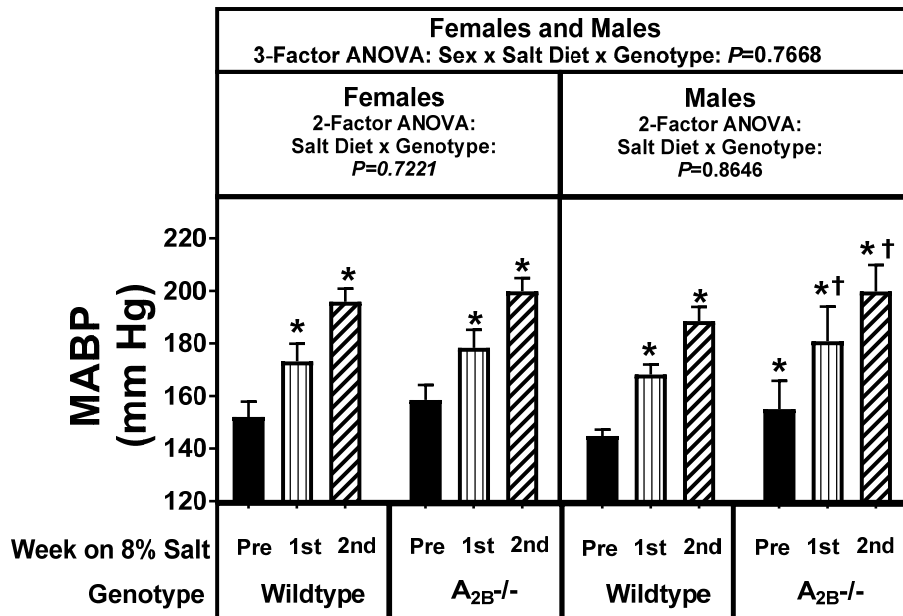

### D

#### 8% Salt Diet on SBP

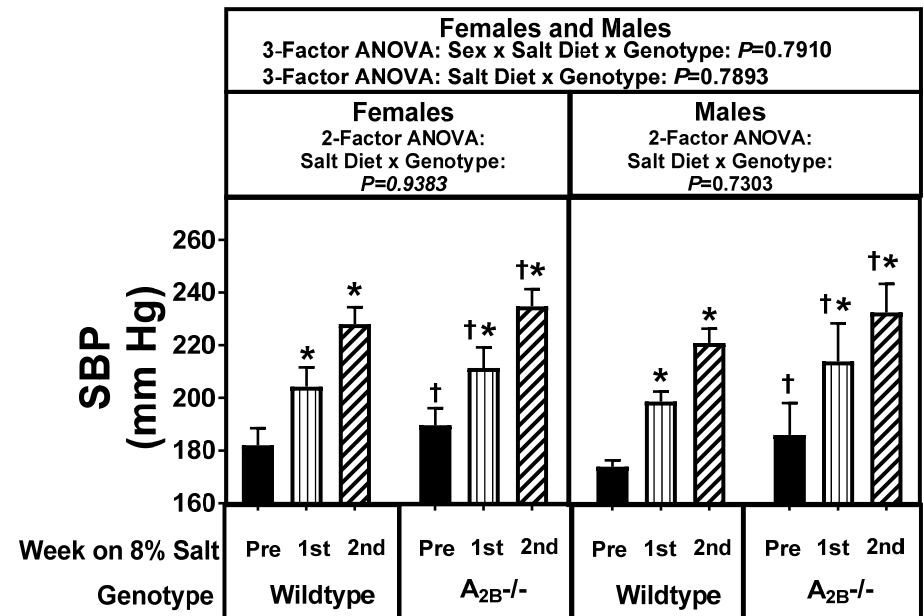



**Figure S23.** Panel A illustrates the effects of a 8% salt diet on daily mean arterial blood pressure (MABP) in female wild-type Dahl SS rats (WT) versus female  $A_{2B}$  knockout Dahl SS rats ( $A_{2B}^{-/-}$ ); panel B reports the effects of 8% salt diet on daily MABP in male WT versus male  $A_{2B}^{-/-}$  Dahl SS rats. Panel C summarizes for both females and males the weekly average MABP before (pre) starting the 8% salt diet and then during the 1<sup>st</sup> and 2<sup>nd</sup> weeks of the 8% salt diet. Panel D provides the same information and analysis as panel C for systolic blood pressure (SBP). Data were analyzed by 2-factor and 3-factor analysis of variance (ANOVA), with specific contrasts using Bonferroni tests (\*indicates  $P < 0.05$  versus corresponding “pre” period; †indicates  $P < 0.05$  versus corresponding period in wildtype). Values are means  $\pm$  SEM.

## 8% Salt Diet on DBP

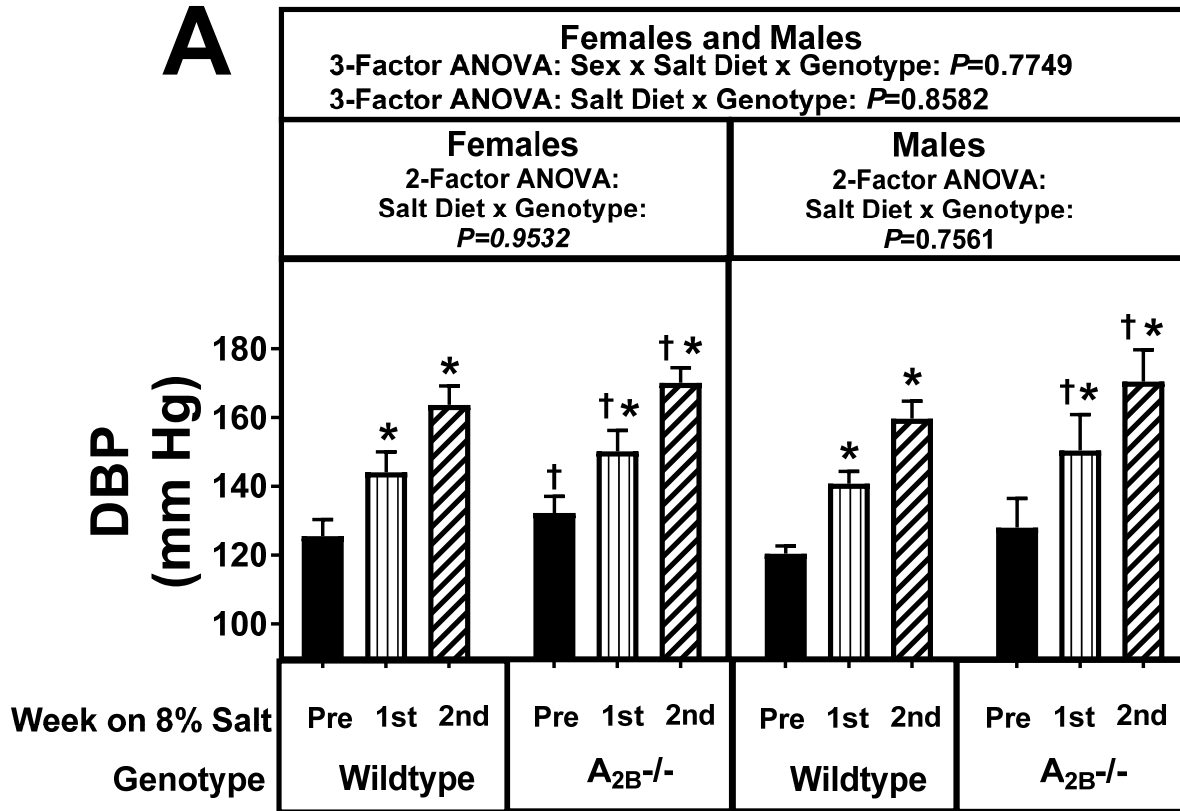

## 8% Salt Diet on HR

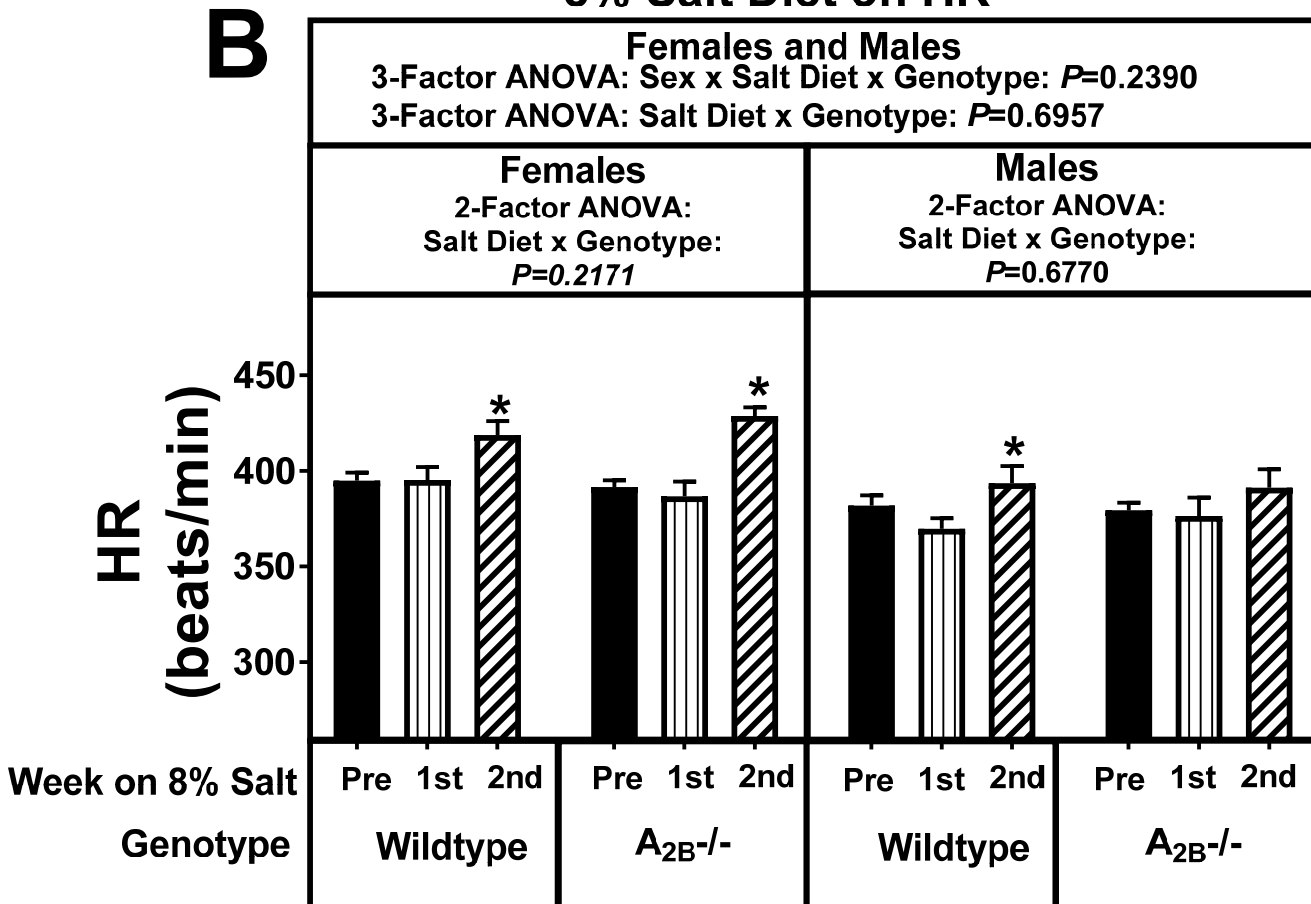

**Figure S24.** Panel A summarizes for both female and male  $A_{2B}$  knockout (-/-) and wildtype Dahl SS rats the weekly average diastolic blood pressure (DBP) before (pre) starting the 8% salt diet and then during the 1<sup>st</sup> and 2<sup>nd</sup> weeks of the 8% salt diet. Panel B provides the same information and analysis as panel A, but for heart rate (HR). Data were analyzed by 2-factor and 3-factor analysis of variance (ANOVA), with specific contrasts using Bonferroni tests (\*indicates  $P < 0.05$  versus corresponding “pre” period; †indicates  $P < 0.05$  versus corresponding period in wildtype). Values are means  $\pm$  SEM.

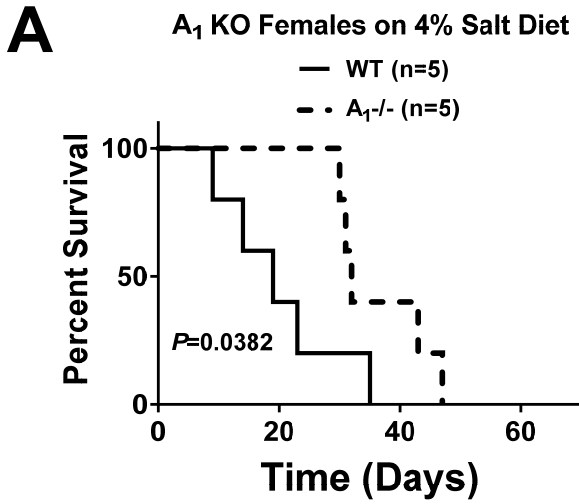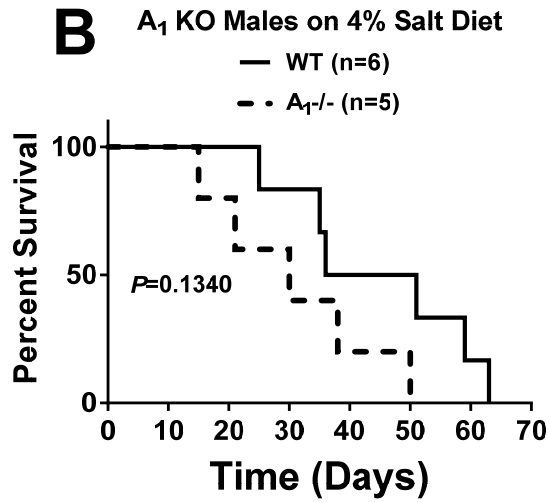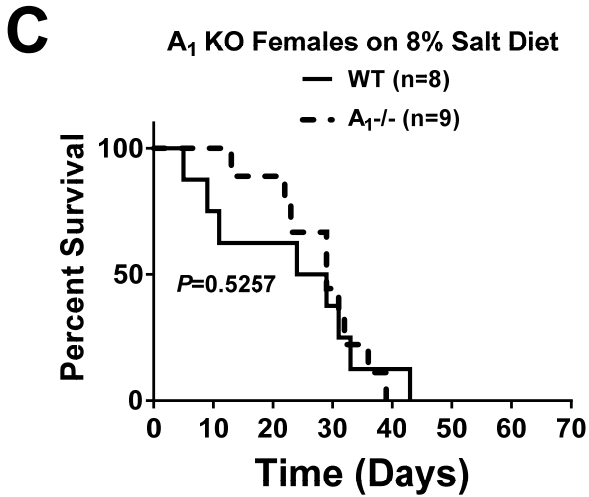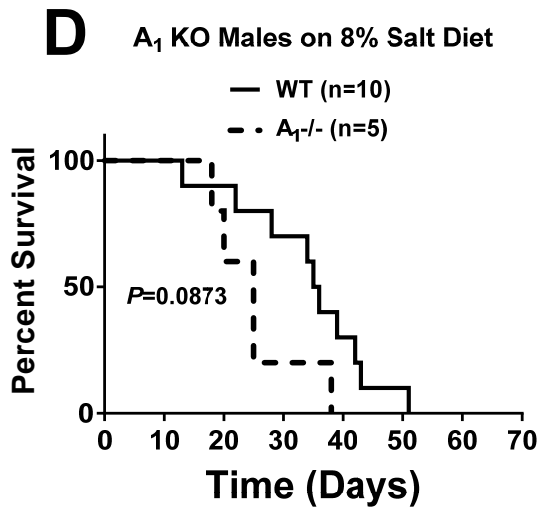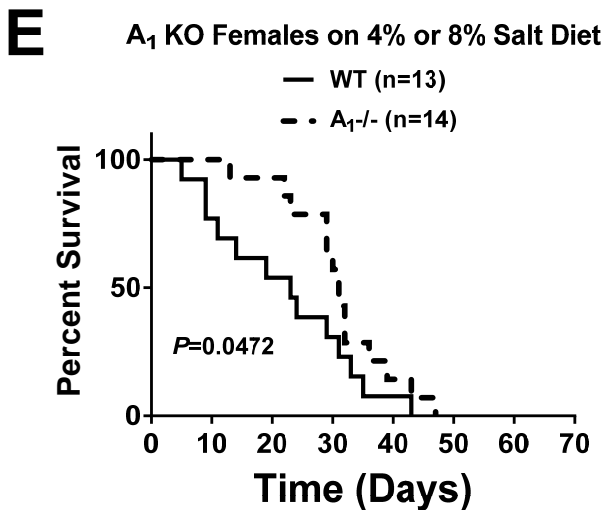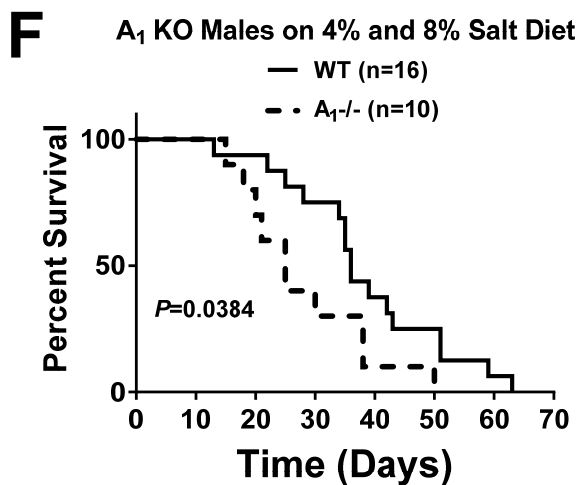

**Figure S25.** Figure summarizes survival curves for wildtype (WT) versus  $A_1$  knockout (KO,  $A_1^{-/-}$ ) Dahl SS rats for females (A, C, and E) and males (B, D, and F) on either a 4% (A, B) or 8% (C, D) salt diet. Panels E and F show the survival curves for females and males when the data from all high salt diets (4% + 8%) were combined.

**A****4% Salt Diet on Diurnal Variation**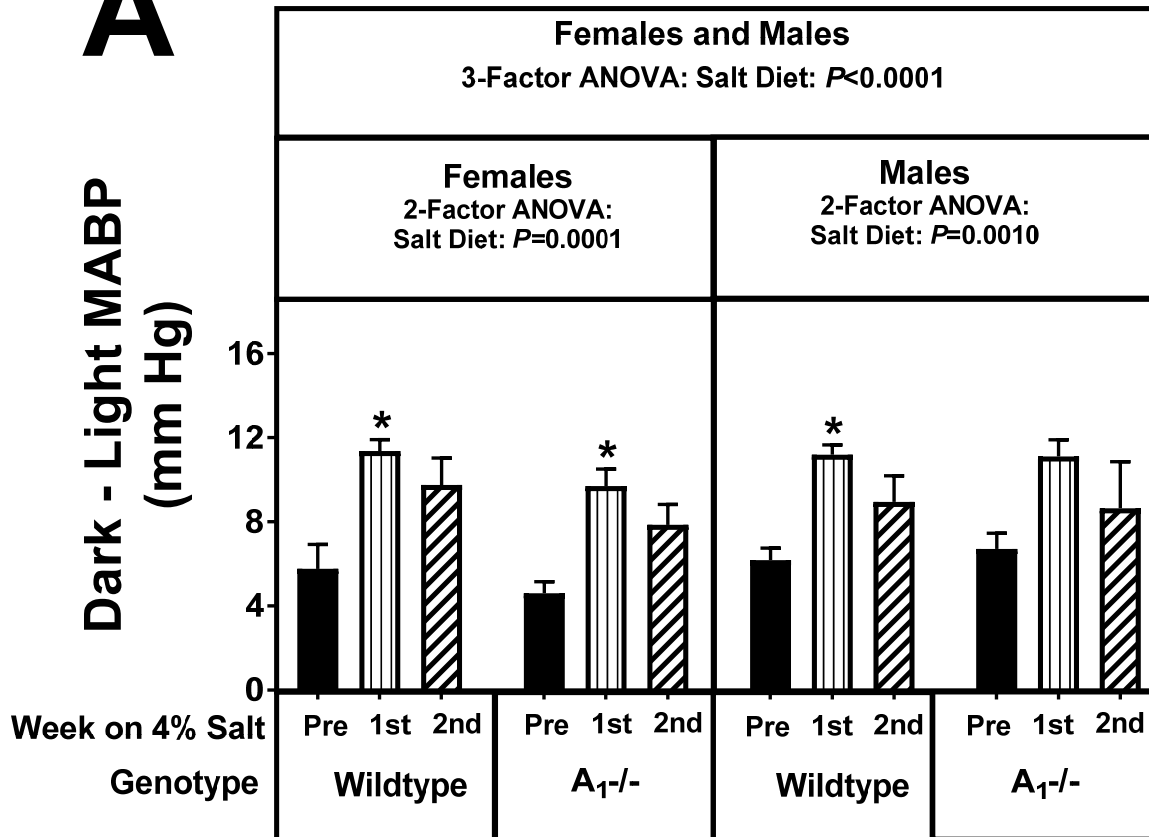**8% Salt Diet on Diurnal Variation****B**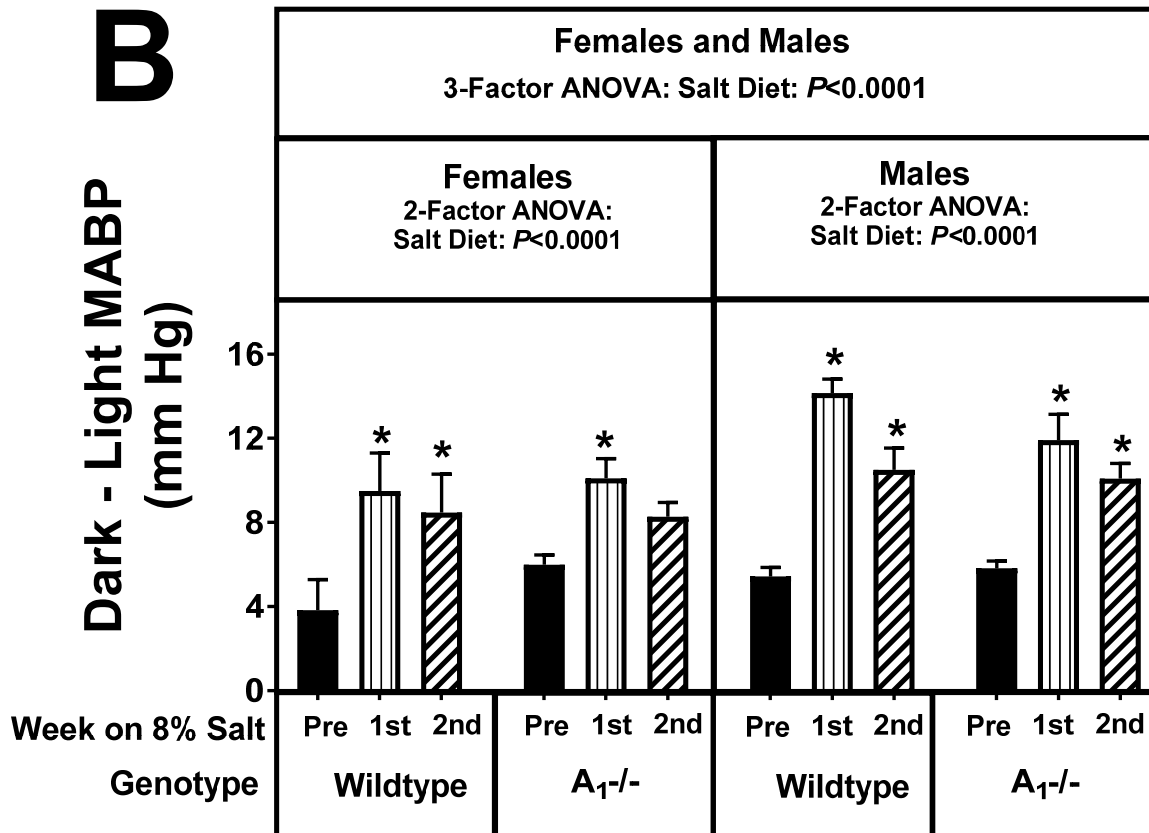

**Figure S26.** Panel A summarizes for both female and male  $A_1$  knockout (-/-) and wildtype Dahl SS rats the weekly diurnal variation of mean arterial blood pressure (MABP) before (pre) starting the 4% salt diet and then during the 1<sup>st</sup> and 2<sup>nd</sup> weeks of the 4% salt diet. Panel B provides the same information and analysis as panel A, but for rats on the 8% salt diet. Data were analyzed by 2-factor and 3-factor analysis of variance (ANOVA), with specific contrasts using Bonferroni tests (\*indicates  $P < 0.05$  versus corresponding “pre” period). Values are means  $\pm$  SEM.

**A****4% Salt Diet on Diurnal Variation**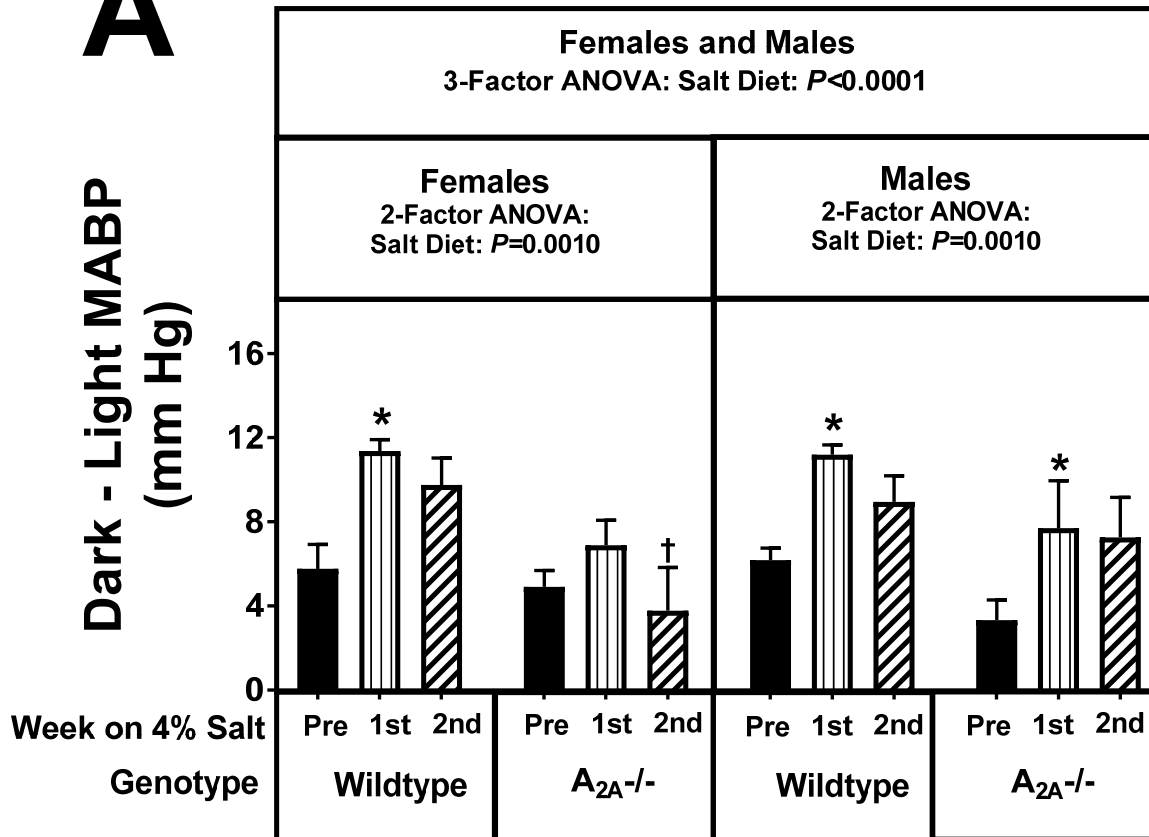**8% Salt Diet on Diurnal Variation****B**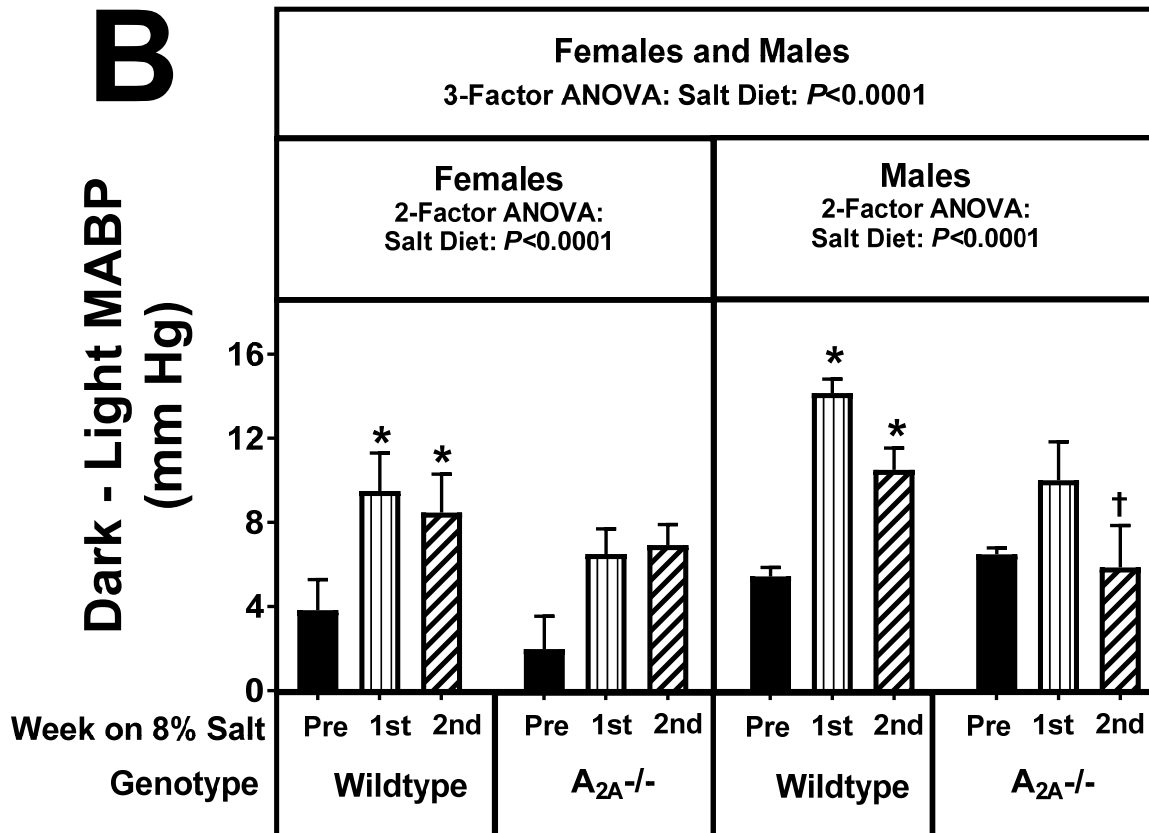



**Figure S27.** Panel A summarizes for both female and male  $A_{2A}$  knockout (-/-) and wildtype Dahl SS rats the weekly diurnal variation of mean arterial blood pressure (MABP) before (pre) starting the 4% salt diet and then during the 1<sup>st</sup> and 2<sup>nd</sup> weeks of the 4% salt diet. Panel B provides the same information and analysis as panel A, but for rats on the 8% salt diet. Data were analyzed by 2-factor and 3-factor analysis of variance (ANOVA), with specific contrasts using Bonferroni tests (\*indicates  $P < 0.05$  versus corresponding “pre” period; †indicates  $P < 0.05$  versus corresponding period in wildtype). Values are means  $\pm$  SEM.

**A****4% Salt Diet on Diurnal Variation**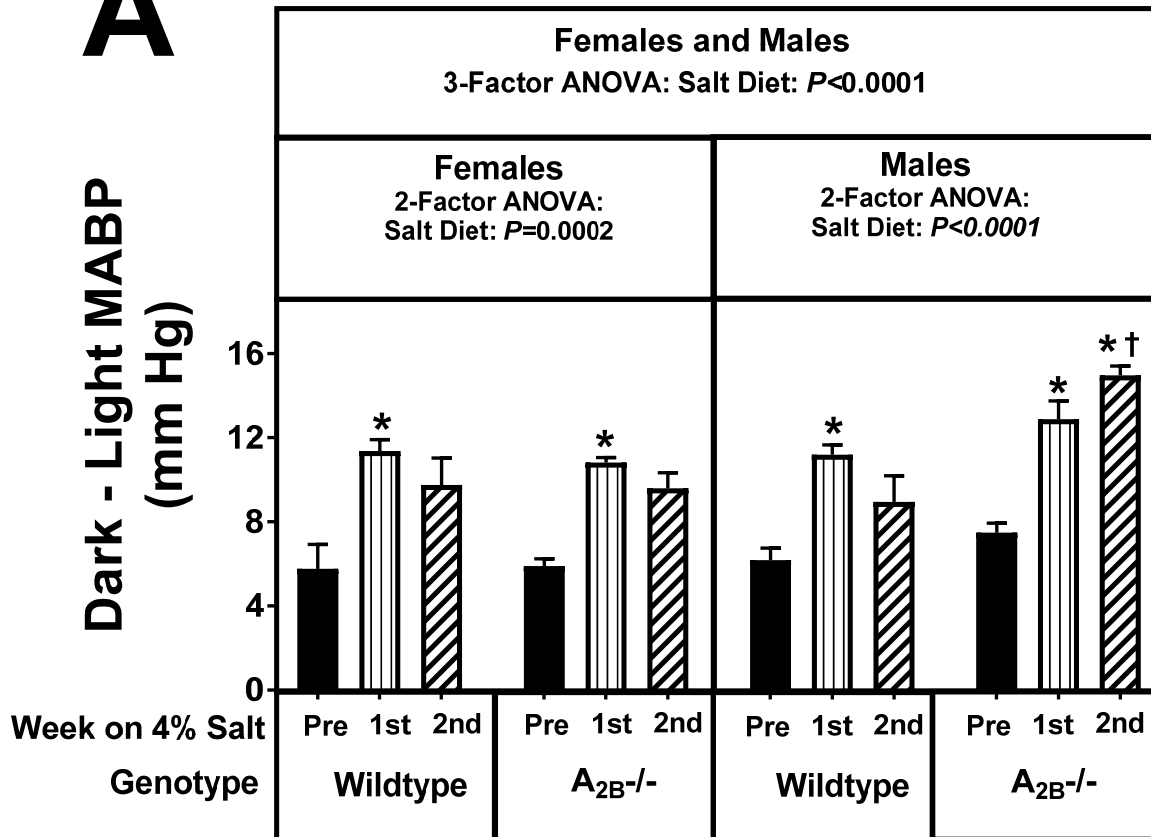**8% Salt Diet on Diurnal Variation****B**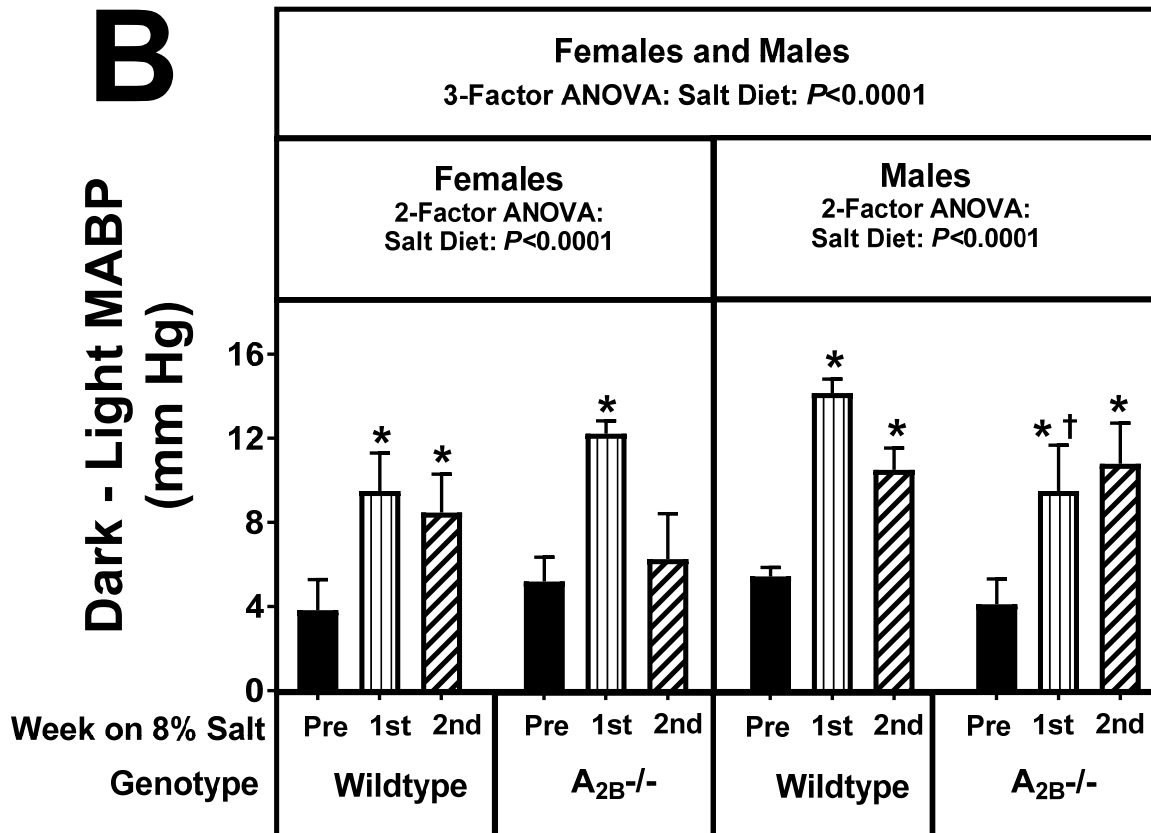

**Figure S28.** Panel A summarizes for both female and male  $A_{2B}$  knockout (-/-) and wildtype Dahl SS rats the weekly diurnal variation of mean arterial blood pressure (MABP) before (pre) starting the 4% salt diet and then during the 1<sup>st</sup> and 2<sup>nd</sup> weeks of the 4% salt diet. Panel B provides the same information and analysis as panel A, but for rats on the 8% salt diet. Data were analyzed by 2-factor and 3-factor analysis of variance (ANOVA), with specific contrasts using Bonferroni tests (\*indicates  $P < 0.05$  versus corresponding “pre” period; †indicates  $P < 0.05$  versus corresponding period in wildtype). Values are means  $\pm$  SEM.
